# Supplementary material for: DeMAG predicts the effects of variants in clinically actionable genes by integrating structural and evolutionary epistatic features
Source: Nat Commun. 2023 Apr 19;14:2230. doi: 10.1038/s41467-023-37661-z (PMC10115847; doi:10.1038/s41467-023-37661-z)
Supplement: Supplementary file 4 — Supplementary Data 1 [file 41467_2023_37661_MOESM4_ESM.xlsx]

## Sheet: ClinVar variants per genes
uniprot id	pathogenic	benign	tot	filter
A0A140G945	5	0	5	genes with only pathogenic variants
A0PJY2	0	1	1	genes with only benign variants
A1L4H1	0	1	1	genes with only benign variants
A1X283	0	9	9	genes with only benign variants
A2IDD5	0	11	11	genes with only benign variants
A2PYH4	0	1	1	genes with only benign variants
A2RRL7	0	1	1	genes with only benign variants
A2RRP1	6	8	14	genes with at least 5 pathogenic and benign variants
A4D126	2	7	9	genes with either less than 5 and or benign variants
A4D1T9	0	1	1	genes with only benign variants							Row Labels	Count of acc
A5D8V7	0	6	6	genes with only benign variants							genes with only pathogenic variants	619
A6H8Y1	0	22	22	genes with only benign variants							genes with only benign variants	1306
A6NCS4	0	1	1	genes with only benign variants							genes with at least 5 pathogenic and benign variants	367
A6NFK2	0	2	2	genes with only benign variants							genes with either less than 5 and or benign variants	1334
A6NGG8	0	16	16	genes with only benign variants							Grand Total	3626
A6NHR9	1	8	9	genes with either less than 5 and or benign variants
A6NI61	1	0	1	genes with only pathogenic variants
A6NK58	3	0	3	genes with only pathogenic variants
A6NNB3	2	4	6	genes with either less than 5 and or benign variants
A6NNN8	1	0	1	genes with only pathogenic variants
A7XYQ1	0	3	3	genes with only benign variants
A8K2U0	0	50	50	genes with only benign variants							genes with only pathogenic variants	619
A8MT33	0	1	1	genes with only benign variants							genes with only benign variants	1306
A8MXD5	0	3	3	genes with only benign variants							genes with at least 5 pathogenic and benign variants	367
A8TX70	0	2	2	genes with only benign variants							genes with either less than 5 and or benign variants	1334
B1AK53	0	14	14	genes with only benign variants							clinvar genes with < 2 review stars variants	5605	source:https://simple-clinvar.broadinstitute.org/ (database version July 14, 2021)
B2RTY4	0	2	2	genes with only benign variants
C9JE40	2	0	2	genes with only pathogenic variants
C9JR72	0	18	18	genes with only benign variants
E9PQ53	1	0	1	genes with only pathogenic variants
F8WCM5	6	1	7	genes with either less than 5 and or benign variants
M0R2J8	0	1	1	genes with only benign variants
O00116	0	3	3	genes with only benign variants
O00139	2	4	6	genes with either less than 5 and or benign variants
O00142	16	2	18	genes with either less than 5 and or benign variants
O00159	0	8	8	genes with only benign variants
O00160	0	9	9	genes with only benign variants
O00165	0	1	1	genes with only benign variants
O00170	2	0	2	genes with only pathogenic variants
O00187	0	10	10	genes with only benign variants
O00189	3	2	5	genes with either less than 5 and or benign variants
O00192	0	1	1	genes with only benign variants
O00203	0	5	5	genes with only benign variants
O00204	4	1	5	genes with either less than 5 and or benign variants
O00217	7	1	8	genes with either less than 5 and or benign variants
O00238	1	7	8	genes with either less than 5 and or benign variants
O00255	61	1	62	genes with either less than 5 and or benign variants
O00287	0	2	2	genes with only benign variants
O00291	0	2	2	genes with only benign variants
O00292	0	9	9	genes with only benign variants
O00294	9	0	9	genes with only pathogenic variants
O00300	0	2	2	genes with only benign variants
O00305	0	3	3	genes with only benign variants
O00329	3	5	8	genes with either less than 5 and or benign variants
O00330	1	9	10	genes with either less than 5 and or benign variants
O00400	0	4	4	genes with only benign variants
O00429	10	1	11	genes with either less than 5 and or benign variants
O00444	0	1	1	genes with only benign variants
O00458	0	1	1	genes with only benign variants
O00459	7	8	15	genes with at least 5 pathogenic and benign variants
O00462	0	5	5	genes with only benign variants
O00468	0	26	26	genes with only benign variants
O00469	5	6	11	genes with at least 5 pathogenic and benign variants
O00482	1	0	1	genes with only pathogenic variants
O00499	3	3	6	genes with either less than 5 and or benign variants
O00522	6	3	9	genes with either less than 5 and or benign variants
O00533	0	1	1	genes with only benign variants
O00555	47	31	78	genes with at least 5 pathogenic and benign variants
O00571	37	0	37	genes with only pathogenic variants
O00584	0	5	5	genes with only benign variants
O00623	1	2	3	genes with either less than 5 and or benign variants
O00628	6	1	7	genes with either less than 5 and or benign variants
O00712	5	0	5	genes with only pathogenic variants
O00744	0	1	1	genes with only benign variants
O00754	10	10	20	genes with at least 5 pathogenic and benign variants
O00755	1	0	1	genes with only pathogenic variants
O00764	1	1	2	genes with either less than 5 and or benign variants
O14497	7	20	27	genes with at least 5 pathogenic and benign variants
O14520	0	5	5	genes with only benign variants
O14521	14	1	15	genes with either less than 5 and or benign variants
O14529	0	2	2	genes with only benign variants
O14578	1	6	7	genes with either less than 5 and or benign variants
O14593	2	3	5	genes with either less than 5 and or benign variants
O14640	0	4	4	genes with only benign variants
O14647	12	33	45	genes with at least 5 pathogenic and benign variants
O14649	0	1	1	genes with only benign variants
O14653	1	1	2	genes with either less than 5 and or benign variants
O14656	1	4	5	genes with either less than 5 and or benign variants
O14662	0	8	8	genes with only benign variants
O14678	1	7	8	genes with either less than 5 and or benign variants
O14686	29	84	113	genes with at least 5 pathogenic and benign variants
O14745	0	1	1	genes with only benign variants
O14746	20	3	23	genes with either less than 5 and or benign variants
O14764	0	2	2	genes with only benign variants
O14770	3	0	3	genes with only pathogenic variants
O14773	23	9	32	genes with at least 5 pathogenic and benign variants
O14775	1	2	3	genes with either less than 5 and or benign variants
O14788	0	3	3	genes with only benign variants
O14791	0	2	2	genes with only benign variants
O14793	0	8	8	genes with only benign variants
O14802	12	4	16	genes with either less than 5 and or benign variants
O14807	1	1	2	genes with either less than 5 and or benign variants
O14832	5	3	8	genes with either less than 5 and or benign variants
O14836	1	4	5	genes with either less than 5 and or benign variants
O14841	1	0	1	genes with only pathogenic variants
O14874	0	1	1	genes with only benign variants
O14896	13	2	15	genes with either less than 5 and or benign variants
O14901	0	11	11	genes with only benign variants
O14920	1	0	1	genes with only pathogenic variants
O14926	0	4	4	genes with only benign variants
O14936	17	1	18	genes with either less than 5 and or benign variants
O14949	1	0	1	genes with only pathogenic variants
O14958	7	4	11	genes with either less than 5 and or benign variants
O14965	0	1	1	genes with only benign variants
O14979	1	0	1	genes with only pathogenic variants
O14983	0	3	3	genes with only benign variants
O15013	0	5	5	genes with only benign variants
O15020	10	37	47	genes with at least 5 pathogenic and benign variants
O15040	0	10	10	genes with only benign variants
O15041	0	5	5	genes with only benign variants
O15047	1	0	1	genes with only pathogenic variants
O15055	0	1	1	genes with only benign variants
O15072	0	1	1	genes with only benign variants
O15078	6	16	22	genes with at least 5 pathogenic and benign variants
O15090	0	1	1	genes with only benign variants
O15118	58	9	67	genes with at least 5 pathogenic and benign variants
O15119	2	6	8	genes with either less than 5 and or benign variants
O15120	3	2	5	genes with either less than 5 and or benign variants
O15121	4	0	4	genes with only pathogenic variants
O15123	0	1	1	genes with only benign variants
O15146	3	9	12	genes with either less than 5 and or benign variants
O15160	11	1	12	genes with either less than 5 and or benign variants
O15169	0	1	1	genes with only benign variants
O15178	0	1	1	genes with only benign variants
O15198	0	2	2	genes with only benign variants
O15228	1	3	4	genes with either less than 5 and or benign variants
O15230	0	5	5	genes with only benign variants
O15232	2	8	10	genes with either less than 5 and or benign variants
O15247	0	1	1	genes with only benign variants
O15259	2	6	8	genes with either less than 5 and or benign variants
O15265	0	1	1	genes with only benign variants
O15266	4	0	4	genes with only pathogenic variants
O15269	6	3	9	genes with either less than 5 and or benign variants
O15270	4	6	10	genes with either less than 5 and or benign variants
O15273	0	3	3	genes with only benign variants
O15287	1	5	6	genes with either less than 5 and or benign variants
O15294	2	0	2	genes with only pathogenic variants
O15297	0	1	1	genes with only benign variants
O15303	4	8	12	genes with either less than 5 and or benign variants
O15305	37	2	39	genes with either less than 5 and or benign variants
O15315	0	2	2	genes with only benign variants
O15344	3	1	4	genes with either less than 5 and or benign variants
O15353	0	3	3	genes with only benign variants
O15357	0	2	2	genes with only benign variants
O15360	27	24	51	genes with at least 5 pathogenic and benign variants
O15379	2	0	2	genes with only pathogenic variants
O15399	4	4	8	genes with either less than 5 and or benign variants
O15409	1	5	6	genes with either less than 5 and or benign variants
O15455	0	1	1	genes with only benign variants
O15457	1	0	1	genes with only pathogenic variants
O15484	2	3	5	genes with either less than 5 and or benign variants
O15488	0	10	10	genes with only benign variants
O15520	4	3	7	genes with either less than 5 and or benign variants
O15528	8	1	9	genes with either less than 5 and or benign variants
O15537	39	1	40	genes with either less than 5 and or benign variants
O15541	1	1	2	genes with either less than 5 and or benign variants
O15550	4	11	15	genes with either less than 5 and or benign variants
O15553	4	2	6	genes with either less than 5 and or benign variants
O15554	2	0	2	genes with only pathogenic variants
O43151	1	0	1	genes with only pathogenic variants
O43167	1	0	1	genes with only pathogenic variants
O43172	1	0	1	genes with only pathogenic variants
O43175	4	3	7	genes with either less than 5 and or benign variants
O43181	1	1	2	genes with either less than 5 and or benign variants
O43186	11	5	16	genes with at least 5 pathogenic and benign variants
O43272	3	3	6	genes with either less than 5 and or benign variants
O43280	0	2	2	genes with only benign variants
O43292	4	0	4	genes with only pathogenic variants
O43299	0	10	10	genes with only benign variants
O43303	0	2	2	genes with only benign variants
O43306	1	0	1	genes with only pathogenic variants
O43307	2	2	4	genes with either less than 5 and or benign variants
O43316	0	6	6	genes with only benign variants
O43318	5	0	5	genes with only pathogenic variants
O43323	1	0	1	genes with only pathogenic variants
O43379	5	14	19	genes with at least 5 pathogenic and benign variants
O43395	6	1	7	genes with either less than 5 and or benign variants
O43405	4	7	11	genes with either less than 5 and or benign variants
O43424	1	1	2	genes with either less than 5 and or benign variants
O43426	1	9	10	genes with either less than 5 and or benign variants
O43435	2	2	4	genes with either less than 5 and or benign variants
O43462	4	0	4	genes with only pathogenic variants
O43464	0	3	3	genes with only benign variants
O43490	3	2	5	genes with either less than 5 and or benign variants
O43497	6	12	18	genes with at least 5 pathogenic and benign variants
O43502	7	3	10	genes with either less than 5 and or benign variants
O43505	2	3	5	genes with either less than 5 and or benign variants
O43511	69	11	80	genes with at least 5 pathogenic and benign variants
O43516	0	1	1	genes with only benign variants
O43520	4	9	13	genes with either less than 5 and or benign variants
O43525	14	15	29	genes with at least 5 pathogenic and benign variants
O43526	134	17	151	genes with at least 5 pathogenic and benign variants
O43541	1	1	2	genes with either less than 5 and or benign variants
O43543	0	3	3	genes with only benign variants
O43548	3	12	15	genes with either less than 5 and or benign variants
O43556	3	4	7	genes with either less than 5 and or benign variants
O43570	1	0	1	genes with only pathogenic variants
O43586	2	11	13	genes with either less than 5 and or benign variants
O43593	1	23	24	genes with either less than 5 and or benign variants
O43602	70	0	70	genes with only pathogenic variants
O43615	0	6	6	genes with only benign variants
O43623	0	1	1	genes with only benign variants
O43676	1	0	1	genes with only pathogenic variants
O43678	1	0	1	genes with only pathogenic variants
O43707	1	4	5	genes with either less than 5 and or benign variants
O43708	1	0	1	genes with only pathogenic variants
O43716	1	0	1	genes with only pathogenic variants
O43734	1	2	3	genes with either less than 5 and or benign variants
O43766	2	1	3	genes with either less than 5 and or benign variants
O43772	3	1	4	genes with either less than 5 and or benign variants
O43776	3	0	3	genes with only pathogenic variants
O43790	0	2	2	genes with only benign variants
O43791	3	0	3	genes with only pathogenic variants
O43819	2	2	4	genes with either less than 5 and or benign variants
O43822	3	3	6	genes with either less than 5 and or benign variants
O43825	0	1	1	genes with only benign variants
O43826	9	3	12	genes with either less than 5 and or benign variants
O43837	0	1	1	genes with only benign variants
O43896	4	4	8	genes with either less than 5 and or benign variants
O43897	1	0	1	genes with only pathogenic variants
O43909	1	1	2	genes with either less than 5 and or benign variants
O43914	0	3	3	genes with only benign variants
O43918	15	4	19	genes with either less than 5 and or benign variants
O43929	2	3	5	genes with either less than 5 and or benign variants
O43933	7	5	12	genes with at least 5 pathogenic and benign variants
O60216	3	3	6	genes with either less than 5 and or benign variants
O60220	1	0	1	genes with only pathogenic variants
O60240	0	6	6	genes with only benign variants
O60243	0	2	2	genes with only benign variants
O60260	9	7	16	genes with at least 5 pathogenic and benign variants
O60282	1	3	4	genes with either less than 5 and or benign variants
O60290	1	0	1	genes with only pathogenic variants
O60292	0	8	8	genes with only benign variants
O60303	0	1	1	genes with only benign variants
O60308	0	8	8	genes with only benign variants
O60313	24	6	30	genes with at least 5 pathogenic and benign variants
O60315	5	57	62	genes with at least 5 pathogenic and benign variants
O60318	0	2	2	genes with only benign variants
O60331	0	4	4	genes with only benign variants
O60333	1	14	15	genes with either less than 5 and or benign variants
O60341	4	0	4	genes with only pathogenic variants
O60343	0	6	6	genes with only benign variants
O60393	1	15	16	genes with either less than 5 and or benign variants
O60443	0	13	13	genes with only benign variants
O60447	0	1	1	genes with only benign variants
O60479	1	2	3	genes with either less than 5 and or benign variants
O60481	2	2	4	genes with either less than 5 and or benign variants
O60486	0	1	1	genes with only benign variants
O60488	0	1	1	genes with only benign variants
O60494	2	49	51	genes with either less than 5 and or benign variants
O60496	0	1	1	genes with only benign variants
O60500	20	9	29	genes with at least 5 pathogenic and benign variants
O60524	2	0	2	genes with only pathogenic variants
O60548	0	1	1	genes with only benign variants
O60565	0	1	1	genes with only benign variants
O60566	1	6	7	genes with either less than 5 and or benign variants
O60568	0	4	4	genes with only benign variants
O60602	0	1	1	genes with only benign variants
O60610	0	11	11	genes with only benign variants
O60662	0	8	8	genes with only benign variants
O60663	10	4	14	genes with either less than 5 and or benign variants
O60673	1	1	2	genes with either less than 5 and or benign variants
O60674	0	2	2	genes with only benign variants
O60683	2	4	6	genes with either less than 5 and or benign variants
O60687	1	13	14	genes with either less than 5 and or benign variants
O60701	2	0	2	genes with only pathogenic variants
O60706	13	2	15	genes with either less than 5 and or benign variants
O60721	0	5	5	genes with only benign variants
O60733	40	3	43	genes with either less than 5 and or benign variants
O60741	8	6	14	genes with at least 5 pathogenic and benign variants
O60762	3	0	3	genes with only pathogenic variants
O60779	2	2	4	genes with either less than 5 and or benign variants
O60806	0	1	1	genes with only benign variants
O60826	0	8	8	genes with only benign variants
O60828	2	0	2	genes with only pathogenic variants
O60832	9	3	12	genes with either less than 5 and or benign variants
O60840	2	9	11	genes with either less than 5 and or benign variants
O60879	0	1	1	genes with only benign variants
O60880	3	1	4	genes with either less than 5 and or benign variants
O60882	0	4	4	genes with only benign variants
O60890	1	7	8	genes with either less than 5 and or benign variants
O60928	2	0	2	genes with only pathogenic variants
O60930	1	0	1	genes with only pathogenic variants
O60931	9	3	12	genes with either less than 5 and or benign variants
O60934	0	10	10	genes with only benign variants
O60939	0	3	3	genes with only benign variants
O75015	0	1	1	genes with only benign variants
O75027	5	11	16	genes with at least 5 pathogenic and benign variants
O75030	3	8	11	genes with either less than 5 and or benign variants
O75052	0	1	1	genes with only benign variants
O75054	0	1	1	genes with only benign variants
O75061	0	2	2	genes with only benign variants
O75072	3	3	6	genes with either less than 5 and or benign variants
O75096	0	8	8	genes with only benign variants
O75112	1	22	23	genes with either less than 5 and or benign variants
O75127	0	2	2	genes with only benign variants
O75140	0	19	19	genes with only benign variants
O75147	0	21	21	genes with only benign variants
O75153	0	1	1	genes with only benign variants
O75161	2	24	26	genes with either less than 5 and or benign variants
O75165	0	1	1	genes with only benign variants
O75190	7	3	10	genes with either less than 5 and or benign variants
O75197	18	5	23	genes with at least 5 pathogenic and benign variants
O75204	1	5	6	genes with either less than 5 and or benign variants
O75208	0	8	8	genes with only benign variants
O75251	3	1	4	genes with either less than 5 and or benign variants
O75298	0	6	6	genes with only benign variants
O75306	2	5	7	genes with either less than 5 and or benign variants
O75342	11	3	14	genes with either less than 5 and or benign variants
O75352	0	4	4	genes with only benign variants
O75360	5	2	7	genes with either less than 5 and or benign variants
O75369	8	26	34	genes with at least 5 pathogenic and benign variants
O75380	1	0	1	genes with only pathogenic variants
O75381	0	5	5	genes with only benign variants
O75398	10	3	13	genes with either less than 5 and or benign variants
O75419	5	1	6	genes with either less than 5 and or benign variants
O75439	1	0	1	genes with only pathogenic variants
O75443	8	16	24	genes with at least 5 pathogenic and benign variants
O75444	5	2	7	genes with either less than 5 and or benign variants
O75445	86	87	173	genes with at least 5 pathogenic and benign variants
O75462	1	1	2	genes with either less than 5 and or benign variants
O75477	1	0	1	genes with only pathogenic variants
O75489	3	0	3	genes with only pathogenic variants
O75496	1	1	2	genes with either less than 5 and or benign variants
O75503	4	1	5	genes with either less than 5 and or benign variants
O75533	1	0	1	genes with only pathogenic variants
O75558	1	2	3	genes with either less than 5 and or benign variants
O75569	1	5	6	genes with either less than 5 and or benign variants
O75593	7	5	12	genes with at least 5 pathogenic and benign variants
O75603	1	7	8	genes with either less than 5 and or benign variants
O75626	0	1	1	genes with only benign variants
O75631	0	4	4	genes with only benign variants
O75643	8	6	14	genes with at least 5 pathogenic and benign variants
O75648	10	12	22	genes with at least 5 pathogenic and benign variants
O75665	3	11	14	genes with either less than 5 and or benign variants
O75695	5	4	9	genes with either less than 5 and or benign variants
O75712	2	12	14	genes with either less than 5 and or benign variants
O75718	0	1	1	genes with only benign variants
O75746	1	1	2	genes with either less than 5 and or benign variants
O75762	0	1	1	genes with only benign variants
O75787	0	2	2	genes with only benign variants
O75792	4	2	6	genes with either less than 5 and or benign variants
O75800	3	2	5	genes with either less than 5 and or benign variants
O75838	0	2	2	genes with only benign variants
O75840	1	0	1	genes with only pathogenic variants
O75844	2	1	3	genes with either less than 5 and or benign variants
O75845	0	1	1	genes with only benign variants
O75874	2	1	3	genes with either less than 5 and or benign variants
O75879	1	0	1	genes with only pathogenic variants
O75880	2	5	7	genes with either less than 5 and or benign variants
O75881	8	2	10	genes with either less than 5 and or benign variants
O75899	3	6	9	genes with either less than 5 and or benign variants
O75907	1	2	3	genes with either less than 5 and or benign variants
O75914	1	2	3	genes with either less than 5 and or benign variants
O75916	1	2	3	genes with either less than 5 and or benign variants
O75923	36	11	47	genes with at least 5 pathogenic and benign variants
O75962	10	19	29	genes with at least 5 pathogenic and benign variants
O75970	0	12	12	genes with only benign variants
O76024	25	32	57	genes with at least 5 pathogenic and benign variants
O76031	1	0	1	genes with only pathogenic variants
O76039	47	20	67	genes with at least 5 pathogenic and benign variants
O76041	0	20	20	genes with only benign variants
O76082	38	5	43	genes with at least 5 pathogenic and benign variants
O76090	56	3	59	genes with either less than 5 and or benign variants
O76094	0	8	8	genes with only benign variants
O77932	0	1	1	genes with only benign variants
O94761	2	26	28	genes with either less than 5 and or benign variants
O94766	2	2	4	genes with either less than 5 and or benign variants
O94777	0	1	1	genes with only benign variants
O94779	0	1	1	genes with only benign variants
O94805	3	0	3	genes with only pathogenic variants
O94827	1	13	14	genes with either less than 5 and or benign variants
O94830	1	5	6	genes with either less than 5 and or benign variants
O94855	1	15	16	genes with either less than 5 and or benign variants
O94885	6	3	9	genes with either less than 5 and or benign variants
O94886	3	0	3	genes with only pathogenic variants
O94903	1	2	3	genes with either less than 5 and or benign variants
O94905	1	0	1	genes with only pathogenic variants
O94906	1	1	2	genes with either less than 5 and or benign variants
O94925	1	0	1	genes with only pathogenic variants
O94953	2	0	2	genes with only pathogenic variants
O94972	1	3	4	genes with either less than 5 and or benign variants
O94986	1	9	10	genes with either less than 5 and or benign variants
O94989	0	2	2	genes with only benign variants
O95076	0	1	1	genes with only benign variants
O95136	0	4	4	genes with only benign variants
O95140	52	5	57	genes with at least 5 pathogenic and benign variants
O95153	0	2	2	genes with only benign variants
O95163	2	13	15	genes with either less than 5 and or benign variants
O95180	3	37	40	genes with either less than 5 and or benign variants
O95237	1	1	2	genes with either less than 5 and or benign variants
O95239	0	1	1	genes with only benign variants
O95248	0	7	7	genes with only benign variants
O95255	47	16	63	genes with at least 5 pathogenic and benign variants
O95259	9	5	14	genes with at least 5 pathogenic and benign variants
O95263	0	7	7	genes with only benign variants
O95278	5	3	8	genes with either less than 5 and or benign variants
O95292	1	2	3	genes with either less than 5 and or benign variants
O95294	0	1	1	genes with only benign variants
O95299	0	5	5	genes with only benign variants
O95340	0	2	2	genes with only benign variants
O95342	20	8	28	genes with at least 5 pathogenic and benign variants
O95343	6	2	8	genes with either less than 5 and or benign variants
O95363	15	4	19	genes with either less than 5 and or benign variants
O95382	0	1	1	genes with only benign variants
O95389	2	6	8	genes with either less than 5 and or benign variants
O95394	4	2	6	genes with either less than 5 and or benign variants
O95427	7	6	13	genes with at least 5 pathogenic and benign variants
O95450	0	12	12	genes with only benign variants
O95452	2	5	7	genes with either less than 5 and or benign variants
O95453	2	3	5	genes with either less than 5 and or benign variants
O95455	1	0	1	genes with only pathogenic variants
O95461	1	5	6	genes with either less than 5 and or benign variants
O95467	0	1	1	genes with only benign variants
O95470	1	1	2	genes with either less than 5 and or benign variants
O95477	3	18	21	genes with either less than 5 and or benign variants
O95479	0	1	1	genes with only benign variants
O95500	2	2	4	genes with either less than 5 and or benign variants
O95521	0	1	1	genes with only benign variants
O95528	5	10	15	genes with at least 5 pathogenic and benign variants
O95551	0	1	1	genes with only benign variants
O95571	10	2	12	genes with either less than 5 and or benign variants
O95600	0	1	1	genes with only benign variants
O95602	1	3	4	genes with either less than 5 and or benign variants
O95613	0	77	77	genes with only benign variants
O95622	7	0	7	genes with only pathogenic variants
O95630	6	2	8	genes with either less than 5 and or benign variants
O95672	3	5	8	genes with either less than 5 and or benign variants
O95677	0	6	6	genes with only benign variants
O95714	0	8	8	genes with only benign variants
O95718	0	5	5	genes with only benign variants
O95721	1	3	4	genes with either less than 5 and or benign variants
O95786	1	1	2	genes with either less than 5 and or benign variants
O95817	5	10	15	genes with at least 5 pathogenic and benign variants
O95819	1	0	1	genes with only pathogenic variants
O95822	1	6	7	genes with either less than 5 and or benign variants
O95831	9	9	18	genes with at least 5 pathogenic and benign variants
O95832	0	1	1	genes with only benign variants
O95859	2	2	4	genes with either less than 5 and or benign variants
O95876	0	6	6	genes with only benign variants
O95932	0	42	42	genes with only benign variants
O95936	0	1	1	genes with only benign variants
O95947	6	1	7	genes with either less than 5 and or benign variants
O95954	0	2	2	genes with only benign variants
O95967	4	1	5	genes with either less than 5 and or benign variants
O95970	2	2	4	genes with either less than 5 and or benign variants
O95972	0	6	6	genes with only benign variants
O95995	0	5	5	genes with only benign variants
O95996	0	2	2	genes with only benign variants
O95999	0	1	1	genes with only benign variants
O96001	0	1	1	genes with only benign variants
O96004	0	1	1	genes with only benign variants
O96007	0	3	3	genes with only benign variants
O96011	0	1	1	genes with only benign variants
O96017	4	6	10	genes with either less than 5 and or benign variants
P00167	1	0	1	genes with only pathogenic variants
P00338	0	1	1	genes with only benign variants
P00367	7	2	9	genes with either less than 5 and or benign variants
P00387	2	2	4	genes with either less than 5 and or benign variants
P00390	0	4	4	genes with only benign variants
P00439	298	1	299	genes with either less than 5 and or benign variants
P00441	41	0	41	genes with only pathogenic variants
P00450	5	7	12	genes with at least 5 pathogenic and benign variants
P00451	91	14	105	genes with at least 5 pathogenic and benign variants
P00480	51	2	53	genes with either less than 5 and or benign variants
P00488	1	2	3	genes with either less than 5 and or benign variants
P00491	3	2	5	genes with either less than 5 and or benign variants
P00492	9	0	9	genes with only pathogenic variants
P00505	3	0	3	genes with only pathogenic variants
P00519	8	0	8	genes with only pathogenic variants
P00533	3	6	9	genes with either less than 5 and or benign variants
P00558	1	1	2	genes with either less than 5 and or benign variants
P00568	0	2	2	genes with only benign variants
P00734	2	1	3	genes with either less than 5 and or benign variants
P00736	9	1	10	genes with either less than 5 and or benign variants
P00740	49	8	57	genes with at least 5 pathogenic and benign variants
P00742	3	3	6	genes with either less than 5 and or benign variants
P00747	1	0	1	genes with only pathogenic variants
P00748	2	5	7	genes with either less than 5 and or benign variants
P00749	0	17	17	genes with only benign variants
P00751	0	8	8	genes with only benign variants
P00797	1	2	3	genes with either less than 5 and or benign variants
P00813	19	3	22	genes with either less than 5 and or benign variants
P00918	1	1	2	genes with either less than 5 and or benign variants
P00966	31	2	33	genes with either less than 5 and or benign variants
P00995	0	4	4	genes with only benign variants
P01008	12	1	13	genes with either less than 5 and or benign variants
P01009	8	32	40	genes with at least 5 pathogenic and benign variants
P01011	0	2	2	genes with only benign variants
P01019	1	7	8	genes with either less than 5 and or benign variants
P01023	0	1	1	genes with only benign variants
P01024	3	3	6	genes with either less than 5 and or benign variants
P01031	0	2	2	genes with only benign variants
P01034	0	1	1	genes with only benign variants
P01040	0	1	1	genes with only benign variants
P01111	12	1	13	genes with either less than 5 and or benign variants
P01112	21	2	23	genes with either less than 5 and or benign variants
P01116	29	3	32	genes with either less than 5 and or benign variants
P01127	2	2	4	genes with either less than 5 and or benign variants
P01130	494	51	545	genes with at least 5 pathogenic and benign variants
P01133	0	15	15	genes with only benign variants
P01137	6	3	9	genes with either less than 5 and or benign variants
P01138	0	6	6	genes with only benign variants
P01148	0	1	1	genes with only benign variants
P01160	0	4	4	genes with only benign variants
P01185	1	0	1	genes with only pathogenic variants
P01189	0	1	1	genes with only benign variants
P01213	1	7	8	genes with either less than 5 and or benign variants
P01222	0	1	1	genes with only benign variants
P01229	0	3	3	genes with only benign variants
P01241	2	3	5	genes with either less than 5 and or benign variants
P01266	2	21	23	genes with either less than 5 and or benign variants
P01270	1	0	1	genes with only pathogenic variants
P01344	3	0	3	genes with only pathogenic variants
P01589	1	1	2	genes with either less than 5 and or benign variants
P01730	0	1	1	genes with only benign variants
P02452	101	12	113	genes with at least 5 pathogenic and benign variants
P02458	89	9	98	genes with at least 5 pathogenic and benign variants
P02461	100	21	121	genes with at least 5 pathogenic and benign variants
P02462	41	19	60	genes with at least 5 pathogenic and benign variants
P02511	1	0	1	genes with only pathogenic variants
P02533	19	3	22	genes with either less than 5 and or benign variants
P02538	12	1	13	genes with either less than 5 and or benign variants
P02545	93	2	95	genes with either less than 5 and or benign variants
P02549	5	16	21	genes with at least 5 pathogenic and benign variants
P02647	0	3	3	genes with only benign variants
P02649	3	1	4	genes with either less than 5 and or benign variants
P02671	3	5	8	genes with either less than 5 and or benign variants
P02675	1	1	2	genes with either less than 5 and or benign variants
P02679	4	2	6	genes with either less than 5 and or benign variants
P02689	2	1	3	genes with either less than 5 and or benign variants
P02708	6	3	9	genes with either less than 5 and or benign variants
P02730	13	7	20	genes with at least 5 pathogenic and benign variants
P02745	1	1	2	genes with either less than 5 and or benign variants
P02747	1	0	1	genes with only pathogenic variants
P02748	0	3	3	genes with only benign variants
P02751	8	8	16	genes with at least 5 pathogenic and benign variants
P02753	2	0	2	genes with only pathogenic variants
P02766	38	3	41	genes with either less than 5 and or benign variants
P02768	0	4	4	genes with only benign variants
P02771	1	0	1	genes with only pathogenic variants
P02787	0	6	6	genes with only benign variants
P02792	1	2	3	genes with either less than 5 and or benign variants
P02794	0	1	1	genes with only benign variants
P03372	0	1	1	genes with only benign variants
P03950	1	3	4	genes with either less than 5 and or benign variants
P03951	16	3	19	genes with either less than 5 and or benign variants
P03952	1	2	3	genes with either less than 5 and or benign variants
P03971	0	2	2	genes with only benign variants
P04000	1	1	2	genes with either less than 5 and or benign variants
P04049	41	11	52	genes with at least 5 pathogenic and benign variants
P04062	52	3	55	genes with either less than 5 and or benign variants
P04066	3	8	11	genes with either less than 5 and or benign variants
P04070	23	0	23	genes with only pathogenic variants
P04114	2	76	78	genes with either less than 5 and or benign variants
P04150	0	4	4	genes with only benign variants
P04156	9	6	15	genes with at least 5 pathogenic and benign variants
P04180	3	2	5	genes with either less than 5 and or benign variants
P04181	11	1	12	genes with either less than 5 and or benign variants
P04198	3	3	6	genes with either less than 5 and or benign variants
P04259	3	2	5	genes with either less than 5 and or benign variants
P04264	8	7	15	genes with at least 5 pathogenic and benign variants
P04275	69	16	85	genes with at least 5 pathogenic and benign variants
P04350	22	2	24	genes with either less than 5 and or benign variants
P04424	32	2	34	genes with either less than 5 and or benign variants
P04626	1	2	3	genes with either less than 5 and or benign variants
P04628	1	1	2	genes with either less than 5 and or benign variants
P04629	9	9	18	genes with at least 5 pathogenic and benign variants
P04637	161	67	228	genes with at least 5 pathogenic and benign variants
P04792	15	3	18	genes with either less than 5 and or benign variants
P04839	20	3	23	genes with either less than 5 and or benign variants
P04844	0	1	1	genes with only benign variants
P05019	1	2	3	genes with either less than 5 and or benign variants
P05023	3	0	3	genes with only pathogenic variants
P05062	5	1	6	genes with either less than 5 and or benign variants
P05067	11	4	15	genes with either less than 5 and or benign variants
P05089	8	1	9	genes with either less than 5 and or benign variants
P05093	12	0	12	genes with only pathogenic variants
P05106	28	7	35	genes with at least 5 pathogenic and benign variants
P05107	5	6	11	genes with at least 5 pathogenic and benign variants
P05108	0	3	3	genes with only benign variants
P05111	0	1	1	genes with only benign variants
P05121	0	1	1	genes with only benign variants
P05129	9	5	14	genes with at least 5 pathogenic and benign variants
P05155	14	7	21	genes with at least 5 pathogenic and benign variants
P05156	1	7	8	genes with either less than 5 and or benign variants
P05164	1	0	1	genes with only pathogenic variants
P05165	18	4	22	genes with either less than 5 and or benign variants
P05166	18	1	19	genes with either less than 5 and or benign variants
P05186	38	4	42	genes with either less than 5 and or benign variants
P05305	0	1	1	genes with only benign variants
P05543	0	1	1	genes with only benign variants
P05546	0	1	1	genes with only benign variants
P05549	14	0	14	genes with only pathogenic variants
P05787	0	4	4	genes with only benign variants
P05813	0	2	2	genes with only benign variants
P05976	1	0	1	genes with only pathogenic variants
P05997	6	20	26	genes with at least 5 pathogenic and benign variants
P06132	3	0	3	genes with only pathogenic variants
P06213	5	4	9	genes with either less than 5 and or benign variants
P06239	0	1	1	genes with only benign variants
P06276	5	1	6	genes with either less than 5 and or benign variants
P06280	138	3	141	genes with either less than 5 and or benign variants
P06396	2	23	25	genes with either less than 5 and or benign variants
P06400	15	19	34	genes with at least 5 pathogenic and benign variants
P06727	0	1	1	genes with only benign variants
P06737	2	7	9	genes with either less than 5 and or benign variants
P06744	2	1	3	genes with either less than 5 and or benign variants
P06753	5	1	6	genes with either less than 5 and or benign variants
P06850	0	1	1	genes with only benign variants
P06858	11	2	13	genes with either less than 5 and or benign variants
P06865	28	3	31	genes with either less than 5 and or benign variants
P07099	0	1	1	genes with only benign variants
P07101	11	4	15	genes with either less than 5 and or benign variants
P07195	0	1	1	genes with only benign variants
P07196	10	6	16	genes with at least 5 pathogenic and benign variants
P07202	5	5	10	genes with at least 5 pathogenic and benign variants
P07204	0	6	6	genes with only benign variants
P07225	5	1	6	genes with either less than 5 and or benign variants
P07237	0	1	1	genes with only benign variants
P07315	0	2	2	genes with only benign variants
P07320	1	4	5	genes with either less than 5 and or benign variants
P07333	10	28	38	genes with at least 5 pathogenic and benign variants
P07339	1	3	4	genes with either less than 5 and or benign variants
P07357	0	3	3	genes with only benign variants
P07358	0	1	1	genes with only benign variants
P07359	5	3	8	genes with either less than 5 and or benign variants
P07384	1	1	2	genes with either less than 5 and or benign variants
P07437	7	1	8	genes with either less than 5 and or benign variants
P07477	10	5	15	genes with at least 5 pathogenic and benign variants
P07510	3	1	4	genes with either less than 5 and or benign variants
P07585	0	7	7	genes with only benign variants
P07602	5	2	7	genes with either less than 5 and or benign variants
P07686	13	3	16	genes with either less than 5 and or benign variants
P07737	1	0	1	genes with only pathogenic variants
P07741	6	1	7	genes with either less than 5 and or benign variants
P07766	0	3	3	genes with only benign variants
P07902	62	0	62	genes with only pathogenic variants
P07911	16	10	26	genes with at least 5 pathogenic and benign variants
P07942	0	11	11	genes with only benign variants
P07949	43	15	58	genes with at least 5 pathogenic and benign variants
P07954	57	5	62	genes with at least 5 pathogenic and benign variants
P07988	0	7	7	genes with only benign variants
P07992	1	0	1	genes with only pathogenic variants
P07996	1	1	2	genes with either less than 5 and or benign variants
P08034	82	3	85	genes with either less than 5 and or benign variants
P08069	2	4	6	genes with either less than 5 and or benign variants
P08100	70	2	72	genes with either less than 5 and or benign variants
P08123	111	11	122	genes with at least 5 pathogenic and benign variants
P08151	0	1	1	genes with only benign variants
P08172	0	7	7	genes with only benign variants
P08183	0	2	2	genes with only benign variants
P08217	1	0	1	genes with only pathogenic variants
P08235	1	14	15	genes with either less than 5 and or benign variants
P08236	10	0	10	genes with only pathogenic variants
P08237	0	3	3	genes with only benign variants
P08243	13	1	14	genes with either less than 5 and or benign variants
P08247	0	3	3	genes with only benign variants
P08253	0	6	6	genes with only benign variants
P08311	0	1	1	genes with only benign variants
P08397	14	2	16	genes with either less than 5 and or benign variants
P08473	2	4	6	genes with either less than 5 and or benign variants
P08493	0	2	2	genes with only benign variants
P08514	34	9	43	genes with at least 5 pathogenic and benign variants
P08559	32	5	37	genes with at least 5 pathogenic and benign variants
P08572	5	33	38	genes with at least 5 pathogenic and benign variants
P08574	1	1	2	genes with either less than 5 and or benign variants
P08575	0	5	5	genes with only benign variants
P08581	5	9	14	genes with at least 5 pathogenic and benign variants
P08590	5	0	5	genes with only pathogenic variants
P08603	2	10	12	genes with either less than 5 and or benign variants
P08637	0	3	3	genes with only benign variants
P08684	1	1	2	genes with either less than 5 and or benign variants
P08686	25	3	28	genes with either less than 5 and or benign variants
P08697	0	3	3	genes with only benign variants
P08709	6	1	7	genes with either less than 5 and or benign variants
P08754	2	0	2	genes with only pathogenic variants
P08779	10	2	12	genes with either less than 5 and or benign variants
P08842	3	2	5	genes with either less than 5 and or benign variants
P08F94	40	24	64	genes with at least 5 pathogenic and benign variants
P09001	1	2	3	genes with either less than 5 and or benign variants
P09172	0	12	12	genes with only benign variants
P09211	0	1	1	genes with only benign variants
P09327	0	1	1	genes with only benign variants
P09417	6	0	6	genes with only pathogenic variants
P09467	7	3	10	genes with either less than 5 and or benign variants
P09486	0	1	1	genes with only benign variants
P09619	3	12	15	genes with either less than 5 and or benign variants
P09622	7	3	10	genes with either less than 5 and or benign variants
P09651	1	0	1	genes with only pathogenic variants
P09693	0	1	1	genes with only benign variants
P09758	0	5	5	genes with only benign variants
P09848	0	7	7	genes with only benign variants
P09871	1	1	2	genes with either less than 5 and or benign variants
P09936	0	1	1	genes with only benign variants
P0C0E4	0	2	2	genes with only benign variants
P0C7P3	1	1	2	genes with either less than 5 and or benign variants
P0C7Q2	0	2	2	genes with only benign variants
P0CG37	0	2	2	genes with only benign variants
P0CW18	1	1	2	genes with either less than 5 and or benign variants
P0DN79	43	4	47	genes with either less than 5 and or benign variants
P0DP23	11	0	11	genes with only pathogenic variants
P0DPB5	0	1	1	genes with only benign variants
P10070	0	29	29	genes with only benign variants
P10071	1	36	37	genes with either less than 5 and or benign variants
P10082	0	1	1	genes with only benign variants
P10253	100	10	110	genes with at least 5 pathogenic and benign variants
P10275	55	2	57	genes with either less than 5 and or benign variants
P10301	0	6	6	genes with only benign variants
P10412	0	2	2	genes with only benign variants
P10515	2	11	13	genes with either less than 5 and or benign variants
P10523	2	2	4	genes with either less than 5 and or benign variants
P10589	19	1	20	genes with either less than 5 and or benign variants
P10600	3	4	7	genes with either less than 5 and or benign variants
P10619	1	1	2	genes with either less than 5 and or benign variants
P10635	0	3	3	genes with only benign variants
P10636	9	13	22	genes with at least 5 pathogenic and benign variants
P10643	1	0	1	genes with only pathogenic variants
P10644	4	0	4	genes with only pathogenic variants
P10721	4	6	10	genes with either less than 5 and or benign variants
P10745	3	4	7	genes with either less than 5 and or benign variants
P10746	3	3	6	genes with either less than 5 and or benign variants
P10809	4	3	7	genes with either less than 5 and or benign variants
P10826	5	0	5	genes with only pathogenic variants
P10827	1	0	1	genes with only pathogenic variants
P10828	22	1	23	genes with either less than 5 and or benign variants
P10909	0	1	1	genes with only benign variants
P10911	0	1	1	genes with only benign variants
P10912	1	6	7	genes with either less than 5 and or benign variants
P10916	11	1	12	genes with either less than 5 and or benign variants
P11047	0	1	1	genes with only benign variants
P11055	15	17	32	genes with at least 5 pathogenic and benign variants
P11150	0	2	2	genes with only benign variants
P11161	6	2	8	genes with either less than 5 and or benign variants
P11166	49	6	55	genes with at least 5 pathogenic and benign variants
P11168	1	4	5	genes with either less than 5 and or benign variants
P11171	1	2	3	genes with either less than 5 and or benign variants
P11172	0	3	3	genes with only benign variants
P11177	2	1	3	genes with either less than 5 and or benign variants
P11182	6	5	11	genes with at least 5 pathogenic and benign variants
P11215	0	1	1	genes with only benign variants
P11217	22	6	28	genes with at least 5 pathogenic and benign variants
P11226	1	2	3	genes with either less than 5 and or benign variants
P11230	3	3	6	genes with either less than 5 and or benign variants
P11233	2	0	2	genes with only pathogenic variants
P11274	0	1	1	genes with only benign variants
P11277	3	8	11	genes with either less than 5 and or benign variants
P11310	37	2	39	genes with either less than 5 and or benign variants
P11362	19	7	26	genes with at least 5 pathogenic and benign variants
P11473	4	0	4	genes with only pathogenic variants
P11487	2	2	4	genes with either less than 5 and or benign variants
P11488	0	3	3	genes with only benign variants
P11498	6	8	14	genes with at least 5 pathogenic and benign variants
P11511	3	4	7	genes with either less than 5 and or benign variants
P11532	11	92	103	genes with at least 5 pathogenic and benign variants
P11586	3	2	5	genes with either less than 5 and or benign variants
P11597	0	15	15	genes with only benign variants
P11686	4	4	8	genes with either less than 5 and or benign variants
P11712	0	1	1	genes with only benign variants
P11717	1	0	1	genes with only pathogenic variants
P11802	2	0	2	genes with only pathogenic variants
P11912	1	0	1	genes with only pathogenic variants
P12036	0	10	10	genes with only benign variants
P12081	2	5	7	genes with either less than 5 and or benign variants
P12107	8	10	18	genes with at least 5 pathogenic and benign variants
P12109	31	22	53	genes with at least 5 pathogenic and benign variants
P12110	29	29	58	genes with at least 5 pathogenic and benign variants
P12111	19	66	85	genes with at least 5 pathogenic and benign variants
P12235	4	3	7	genes with either less than 5 and or benign variants
P12259	3	18	21	genes with either less than 5 and or benign variants
P12271	3	1	4	genes with either less than 5 and or benign variants
P12318	0	1	1	genes with only benign variants
P12643	0	1	1	genes with only benign variants
P12644	0	3	3	genes with only benign variants
P12694	21	3	24	genes with either less than 5 and or benign variants
P12755	8	9	17	genes with at least 5 pathogenic and benign variants
P12814	16	0	16	genes with only pathogenic variants
P12821	1	17	18	genes with either less than 5 and or benign variants
P12829	0	2	2	genes with only benign variants
P12830	13	46	59	genes with at least 5 pathogenic and benign variants
P12883	233	19	252	genes with at least 5 pathogenic and benign variants
P12955	3	5	8	genes with either less than 5 and or benign variants
P13385	0	2	2	genes with only benign variants
P13473	2	5	7	genes with either less than 5 and or benign variants
P13497	2	4	6	genes with either less than 5 and or benign variants
P13498	3	1	4	genes with either less than 5 and or benign variants
P13533	4	20	24	genes with either less than 5 and or benign variants
P13535	1	14	15	genes with either less than 5 and or benign variants
P13569	144	3	147	genes with either less than 5 and or benign variants
P13611	0	48	48	genes with only benign variants
P13637	30	2	32	genes with either less than 5 and or benign variants
P13639	1	2	3	genes with either less than 5 and or benign variants
P13645	5	3	8	genes with either less than 5 and or benign variants
P13646	0	21	21	genes with only benign variants
P13647	32	16	48	genes with at least 5 pathogenic and benign variants
P13671	0	1	1	genes with only benign variants
P13686	2	4	6	genes with either less than 5 and or benign variants
P13716	2	1	3	genes with either less than 5 and or benign variants
P13797	1	0	1	genes with only pathogenic variants
P13804	1	3	4	genes with either less than 5 and or benign variants
P13805	0	2	2	genes with only benign variants
P13807	1	2	3	genes with either less than 5 and or benign variants
P13866	1	2	3	genes with either less than 5 and or benign variants
P13929	0	4	4	genes with only benign variants
P13942	6	15	21	genes with at least 5 pathogenic and benign variants
P14136	26	9	35	genes with at least 5 pathogenic and benign variants
P14138	1	1	2	genes with either less than 5 and or benign variants
P14210	0	1	1	genes with only benign variants
P14222	14	3	17	genes with either less than 5 and or benign variants
P14314	0	14	14	genes with only benign variants
P14410	0	3	3	genes with only benign variants
P14416	0	1	1	genes with only benign variants
P14543	1	0	1	genes with only pathogenic variants
P14598	2	0	2	genes with only pathogenic variants
P14653	0	1	1	genes with only benign variants
P14679	45	0	45	genes with only pathogenic variants
P14770	3	1	4	genes with either less than 5 and or benign variants
P14780	0	7	7	genes with only benign variants
P14854	1	0	1	genes with only pathogenic variants
P14867	21	4	25	genes with either less than 5 and or benign variants
P14868	1	1	2	genes with either less than 5 and or benign variants
P14920	0	2	2	genes with only benign variants
P14923	0	3	3	genes with only benign variants
P14927	1	0	1	genes with only pathogenic variants
P15018	0	1	1	genes with only benign variants
P15056	65	13	78	genes with at least 5 pathogenic and benign variants
P15085	1	7	8	genes with either less than 5 and or benign variants
P15104	2	0	2	genes with only pathogenic variants
P15153	1	0	1	genes with only pathogenic variants
P15169	0	1	1	genes with only benign variants
P15259	0	1	1	genes with only benign variants
P15260	1	4	5	genes with either less than 5 and or benign variants
P15289	43	3	46	genes with either less than 5 and or benign variants
P15311	0	1	1	genes with only benign variants
P15313	4	4	8	genes with either less than 5 and or benign variants
P15328	1	0	1	genes with only pathogenic variants
P15382	3	2	5	genes with either less than 5 and or benign variants
P15391	1	1	2	genes with either less than 5 and or benign variants
P15428	1	2	3	genes with either less than 5 and or benign variants
P15498	0	2	2	genes with only benign variants
P15502	2	19	21	genes with either less than 5 and or benign variants
P15509	1	6	7	genes with either less than 5 and or benign variants
P15529	0	3	3	genes with only benign variants
P15538	14	3	17	genes with either less than 5 and or benign variants
P15559	1	0	1	genes with only pathogenic variants
P15586	0	1	1	genes with only benign variants
P15735	3	0	3	genes with only pathogenic variants
P15814	0	5	5	genes with only benign variants
P15822	0	4	4	genes with only benign variants
P15848	46	5	51	genes with at least 5 pathogenic and benign variants
P15863	0	1	1	genes with only benign variants
P15882	1	0	1	genes with only pathogenic variants
P15884	17	12	29	genes with at least 5 pathogenic and benign variants
P15918	32	7	39	genes with at least 5 pathogenic and benign variants
P15923	0	4	4	genes with only benign variants
P15924	11	33	44	genes with at least 5 pathogenic and benign variants
P15976	3	2	5	genes with either less than 5 and or benign variants
P16112	2	7	9	genes with either less than 5 and or benign variants
P16144	11	17	28	genes with at least 5 pathogenic and benign variants
P16157	0	6	6	genes with only benign variants
P16219	21	1	22	genes with either less than 5 and or benign variants
P16234	0	11	11	genes with only benign variants
P16278	41	7	48	genes with at least 5 pathogenic and benign variants
P16389	15	1	16	genes with either less than 5 and or benign variants
P16410	3	1	4	genes with either less than 5 and or benign variants
P16422	0	8	8	genes with only benign variants
P16435	4	2	6	genes with either less than 5 and or benign variants
P16452	1	0	1	genes with only pathogenic variants
P16455	0	1	1	genes with only benign variants
P16471	1	0	1	genes with only pathogenic variants
P16473	3	3	6	genes with either less than 5 and or benign variants
P16499	5	4	9	genes with either less than 5 and or benign variants
P16615	12	4	16	genes with either less than 5 and or benign variants
P16671	1	0	1	genes with only pathogenic variants
P16871	6	6	12	genes with at least 5 pathogenic and benign variants
P16885	0	12	12	genes with only benign variants
P16930	13	3	16	genes with either less than 5 and or benign variants
P17213	0	2	2	genes with only benign variants
P17301	0	28	28	genes with only benign variants
P17302	11	1	12	genes with either less than 5 and or benign variants
P17405	38	8	46	genes with at least 5 pathogenic and benign variants
P17480	1	0	1	genes with only pathogenic variants
P17600	1	1	2	genes with either less than 5 and or benign variants
P17612	1	0	1	genes with only pathogenic variants
P17643	4	4	8	genes with either less than 5 and or benign variants
P17661	25	1	26	genes with either less than 5 and or benign variants
P17735	3	2	5	genes with either less than 5 and or benign variants
P17787	3	10	13	genes with either less than 5 and or benign variants
P17813	20	10	30	genes with at least 5 pathogenic and benign variants
P17900	1	3	4	genes with either less than 5 and or benign variants
P17947	1	0	1	genes with only pathogenic variants
P17948	0	1	1	genes with only benign variants
P18074	9	3	12	genes with either less than 5 and or benign variants
P18077	0	1	1	genes with only benign variants
P18206	1	4	5	genes with either less than 5 and or benign variants
P18505	1	1	2	genes with either less than 5 and or benign variants
P18507	12	3	15	genes with either less than 5 and or benign variants
P18510	0	1	1	genes with only benign variants
P18583	0	1	1	genes with only benign variants
P18850	2	1	3	genes with either less than 5 and or benign variants
P18887	0	2	2	genes with only benign variants
P19013	0	21	21	genes with only benign variants
P19022	2	0	2	genes with only pathogenic variants
P19087	3	2	5	genes with either less than 5 and or benign variants
P19099	3	9	12	genes with either less than 5 and or benign variants
P19235	0	13	13	genes with only benign variants
P19367	4	0	4	genes with only pathogenic variants
P19404	1	2	3	genes with either less than 5 and or benign variants
P19429	38	2	40	genes with either less than 5 and or benign variants
P19438	16	5	21	genes with at least 5 pathogenic and benign variants
P19532	1	0	1	genes with only pathogenic variants
P19544	9	0	9	genes with only pathogenic variants
P19634	1	0	1	genes with only pathogenic variants
P19827	0	1	1	genes with only benign variants
P19835	0	6	6	genes with only benign variants
P19838	3	2	5	genes with either less than 5 and or benign variants
P19878	1	8	9	genes with either less than 5 and or benign variants
P19971	12	7	19	genes with at least 5 pathogenic and benign variants
P20023	0	3	3	genes with only benign variants
P20061	0	3	3	genes with only benign variants
P20062	0	14	14	genes with only benign variants
P20231	0	2	2	genes with only benign variants
P20264	1	0	1	genes with only pathogenic variants
P20396	0	2	2	genes with only benign variants
P20585	0	4	4	genes with only benign variants
P20594	7	1	8	genes with either less than 5 and or benign variants
P20700	1	4	5	genes with either less than 5 and or benign variants
P20711	4	6	10	genes with either less than 5 and or benign variants
P20794	2	1	3	genes with either less than 5 and or benign variants
P20807	47	6	53	genes with at least 5 pathogenic and benign variants
P20810	0	1	1	genes with only benign variants
P20813	0	1	1	genes with only benign variants
P20823	30	13	43	genes with at least 5 pathogenic and benign variants
P20839	2	0	2	genes with only pathogenic variants
P20849	0	6	6	genes with only benign variants
P20908	12	33	45	genes with at least 5 pathogenic and benign variants
P20929	2	82	84	genes with either less than 5 and or benign variants
P20930	0	10	10	genes with only benign variants
P20933	5	4	9	genes with either less than 5 and or benign variants
P20936	0	11	11	genes with only benign variants
P21281	2	0	2	genes with only pathogenic variants
P21333	13	59	72	genes with at least 5 pathogenic and benign variants
P21359	176	10	186	genes with at least 5 pathogenic and benign variants
P21397	1	1	2	genes with either less than 5 and or benign variants
P21439	8	4	12	genes with either less than 5 and or benign variants
P21462	0	2	2	genes with only benign variants
P21549	33	6	39	genes with at least 5 pathogenic and benign variants
P21579	7	0	7	genes with only pathogenic variants
P21580	0	3	3	genes with only benign variants
P21583	1	3	4	genes with either less than 5 and or benign variants
P21675	8	3	11	genes with either less than 5 and or benign variants
P21695	0	2	2	genes with only benign variants
P21731	1	1	2	genes with either less than 5 and or benign variants
P21802	32	4	36	genes with either less than 5 and or benign variants
P21817	104	42	146	genes with at least 5 pathogenic and benign variants
P21860	1	1	2	genes with either less than 5 and or benign variants
P21912	41	5	46	genes with at least 5 pathogenic and benign variants
P21917	0	1	1	genes with only benign variants
P21918	0	1	1	genes with only benign variants
P21953	30	3	33	genes with either less than 5 and or benign variants
P21964	0	1	1	genes with only benign variants
P22004	1	0	1	genes with only pathogenic variants
P22033	63	3	66	genes with either less than 5 and or benign variants
P22105	0	34	34	genes with only benign variants
P22223	1	7	8	genes with either less than 5 and or benign variants
P22304	32	11	43	genes with at least 5 pathogenic and benign variants
P22310	5	0	5	genes with only pathogenic variants
P22314	1	8	9	genes with either less than 5 and or benign variants
P22413	3	2	5	genes with either less than 5 and or benign variants
P22460	0	4	4	genes with only benign variants
P22557	10	10	20	genes with at least 5 pathogenic and benign variants
P22570	7	1	8	genes with either less than 5 and or benign variants
P22607	21	17	38	genes with at least 5 pathogenic and benign variants
P22674	1	1	2	genes with either less than 5 and or benign variants
P22680	0	2	2	genes with only benign variants
P22681	11	12	23	genes with at least 5 pathogenic and benign variants
P22695	2	4	6	genes with either less than 5 and or benign variants
P22735	39	7	46	genes with at least 5 pathogenic and benign variants
P22748	0	5	5	genes with only benign variants
P22794	0	2	2	genes with only benign variants
P22830	4	3	7	genes with either less than 5 and or benign variants
P22888	5	5	10	genes with at least 5 pathogenic and benign variants
P23025	1	5	6	genes with either less than 5 and or benign variants
P23109	0	2	2	genes with only benign variants
P23142	0	2	2	genes with only benign variants
P23229	0	9	9	genes with only benign variants
P23258	3	1	4	genes with either less than 5 and or benign variants
P23284	0	1	1	genes with only benign variants
P23352	1	5	6	genes with either less than 5 and or benign variants
P23378	31	8	39	genes with at least 5 pathogenic and benign variants
P23381	1	0	1	genes with only pathogenic variants
P23409	1	1	2	genes with either less than 5 and or benign variants
P23415	13	7	20	genes with at least 5 pathogenic and benign variants
P23434	1	1	2	genes with either less than 5 and or benign variants
P23458	1	0	1	genes with only pathogenic variants
P23490	0	1	1	genes with only benign variants
P23515	0	2	2	genes with only benign variants
P23526	4	2	6	genes with either less than 5 and or benign variants
P23560	0	1	1	genes with only benign variants
P23760	13	5	18	genes with at least 5 pathogenic and benign variants
P23769	17	3	20	genes with either less than 5 and or benign variants
P23771	3	2	5	genes with either less than 5 and or benign variants
P23786	12	5	17	genes with at least 5 pathogenic and benign variants
P23942	49	1	50	genes with either less than 5 and or benign variants
P23945	1	1	2	genes with either less than 5 and or benign variants
P24043	8	19	27	genes with at least 5 pathogenic and benign variants
P24311	0	1	1	genes with only benign variants
P24386	1	4	5	genes with either less than 5 and or benign variants
P24468	3	0	3	genes with only pathogenic variants
P24530	2	2	4	genes with either less than 5 and or benign variants
P24557	0	4	4	genes with only benign variants
P24752	40	1	41	genes with either less than 5 and or benign variants
P24821	1	20	21	genes with either less than 5 and or benign variants
P24928	6	0	6	genes with only pathogenic variants
P25025	0	1	1	genes with only benign variants
P25054	11	31	42	genes with at least 5 pathogenic and benign variants
P25092	0	1	1	genes with only benign variants
P25189	60	0	60	genes with only pathogenic variants
P25391	2	6	8	genes with either less than 5 and or benign variants
P25445	3	4	7	genes with either less than 5 and or benign variants
P25490	2	0	2	genes with only pathogenic variants
P25686	2	3	5	genes with either less than 5 and or benign variants
P25705	0	3	3	genes with only benign variants
P25942	0	2	2	genes with only benign variants
P25963	1	2	3	genes with either less than 5 and or benign variants
P26006	0	2	2	genes with only benign variants
P26038	1	0	1	genes with only pathogenic variants
P26196	1	0	1	genes with only pathogenic variants
P26358	6	18	24	genes with at least 5 pathogenic and benign variants
P26367	11	0	11	genes with only pathogenic variants
P26439	3	1	4	genes with either less than 5 and or benign variants
P26440	17	3	20	genes with either less than 5 and or benign variants
P26639	0	1	1	genes with only benign variants
P26640	5	1	6	genes with either less than 5 and or benign variants
P26842	2	0	2	genes with only pathogenic variants
P26998	0	4	4	genes with only benign variants
P27169	0	1	1	genes with only benign variants
P27352	0	5	5	genes with only benign variants
P27544	1	0	1	genes with only pathogenic variants
P27635	3	0	3	genes with only pathogenic variants
P27695	0	1	1	genes with only benign variants
P27708	2	2	4	genes with either less than 5 and or benign variants
P27815	0	1	1	genes with only benign variants
P27918	1	1	2	genes with either less than 5 and or benign variants
P27986	3	1	4	genes with either less than 5 and or benign variants
P28062	1	3	4	genes with either less than 5 and or benign variants
P28069	2	0	2	genes with only pathogenic variants
P28300	1	4	5	genes with either less than 5 and or benign variants
P28328	1	1	2	genes with either less than 5 and or benign variants
P28329	6	10	16	genes with at least 5 pathogenic and benign variants
P28330	0	2	2	genes with only benign variants
P28331	11	2	13	genes with either less than 5 and or benign variants
P28335	0	1	1	genes with only benign variants
P28340	2	15	17	genes with either less than 5 and or benign variants
P28358	0	5	5	genes with only benign variants
P28360	0	3	3	genes with only benign variants
P28370	0	1	1	genes with only benign variants
P28472	15	4	19	genes with either less than 5 and or benign variants
P28482	5	0	5	genes with only pathogenic variants
P28715	1	13	14	genes with either less than 5 and or benign variants
P28799	1	10	11	genes with either less than 5 and or benign variants
P29033	56	8	64	genes with at least 5 pathogenic and benign variants
P29120	0	2	2	genes with only benign variants
P29122	0	1	1	genes with only benign variants
P29317	0	17	17	genes with only benign variants
P29323	0	1	1	genes with only benign variants
P29371	0	2	2	genes with only benign variants
P29400	138	17	155	genes with at least 5 pathogenic and benign variants
P29460	0	4	4	genes with only benign variants
P29474	2	0	2	genes with only pathogenic variants
P29597	0	13	13	genes with only benign variants
P29965	13	1	14	genes with either less than 5 and or benign variants
P29973	6	1	7	genes with either less than 5 and or benign variants
P30038	0	7	7	genes with only benign variants
P30084	17	0	17	genes with only pathogenic variants
P30153	5	1	6	genes with either less than 5 and or benign variants
P30279	4	3	7	genes with either less than 5 and or benign variants
P30301	3	4	7	genes with either less than 5 and or benign variants
P30304	0	1	1	genes with only benign variants
P30518	13	15	28	genes with at least 5 pathogenic and benign variants
P30531	31	5	36	genes with at least 5 pathogenic and benign variants
P30556	0	3	3	genes with only benign variants
P30566	18	3	21	genes with either less than 5 and or benign variants
P30613	6	0	6	genes with only pathogenic variants
P30793	10	0	10	genes with only pathogenic variants
P30837	1	3	4	genes with either less than 5 and or benign variants
P30926	0	2	2	genes with only benign variants
P30968	10	0	10	genes with only pathogenic variants
P31040	12	6	18	genes with at least 5 pathogenic and benign variants
P31150	1	1	2	genes with either less than 5 and or benign variants
P31213	17	2	19	genes with either less than 5 and or benign variants
P31271	0	1	1	genes with only benign variants
P31327	10	7	17	genes with at least 5 pathogenic and benign variants
P31371	0	1	1	genes with only benign variants
P31415	0	1	1	genes with only benign variants
P31483	1	2	3	genes with either less than 5 and or benign variants
P31513	5	9	14	genes with at least 5 pathogenic and benign variants
P31629	3	7	10	genes with either less than 5 and or benign variants
P31639	0	1	1	genes with only benign variants
P31641	2	0	2	genes with only pathogenic variants
P31644	1	0	1	genes with only pathogenic variants
P31645	0	2	2	genes with only benign variants
P31749	1	0	1	genes with only pathogenic variants
P31785	10	2	12	genes with either less than 5 and or benign variants
P31939	0	3	3	genes with only benign variants
P31943	1	0	1	genes with only pathogenic variants
P32004	14	6	20	genes with at least 5 pathogenic and benign variants
P32019	0	1	1	genes with only benign variants
P32243	2	0	2	genes with only pathogenic variants
P32245	13	2	15	genes with either less than 5 and or benign variants
P32297	1	0	1	genes with only pathogenic variants
P32322	9	2	11	genes with either less than 5 and or benign variants
P32754	0	4	4	genes with only benign variants
P32926	0	2	2	genes with only benign variants
P32927	0	4	4	genes with only benign variants
P32929	0	1	1	genes with only benign variants
P33076	1	7	8	genes with either less than 5 and or benign variants
P33897	68	12	80	genes with at least 5 pathogenic and benign variants
P33991	0	1	1	genes with only benign variants
P33992	0	1	1	genes with only benign variants
P34059	43	6	49	genes with at least 5 pathogenic and benign variants
P34130	1	1	2	genes with either less than 5 and or benign variants
P34897	2	0	2	genes with only pathogenic variants
P34903	1	0	1	genes with only pathogenic variants
P34910	0	3	3	genes with only benign variants
P34931	0	1	1	genes with only benign variants
P34949	2	3	5	genes with either less than 5 and or benign variants
P34981	1	0	1	genes with only pathogenic variants
P35218	1	3	4	genes with either less than 5 and or benign variants
P35219	0	1	1	genes with only benign variants
P35221	0	4	4	genes with only benign variants
P35222	3	2	5	genes with either less than 5 and or benign variants
P35227	1	0	1	genes with only pathogenic variants
P35237	0	11	11	genes with only benign variants
P35240	4	1	5	genes with either less than 5 and or benign variants
P35241	0	1	1	genes with only benign variants
P35247	0	4	4	genes with only benign variants
P35270	2	1	3	genes with either less than 5 and or benign variants
P35398	1	0	1	genes with only pathogenic variants
P35453	1	3	4	genes with either less than 5 and or benign variants
P35462	0	3	3	genes with only benign variants
P35475	31	6	37	genes with at least 5 pathogenic and benign variants
P35498	301	14	315	genes with at least 5 pathogenic and benign variants
P35499	51	14	65	genes with at least 5 pathogenic and benign variants
P35523	45	11	56	genes with at least 5 pathogenic and benign variants
P35527	5	3	8	genes with either less than 5 and or benign variants
P35548	0	2	2	genes with only benign variants
P35555	522	18	540	genes with at least 5 pathogenic and benign variants
P35556	17	46	63	genes with at least 5 pathogenic and benign variants
P35557	121	0	121	genes with only pathogenic variants
P35558	0	5	5	genes with only benign variants
P35568	0	2	2	genes with only benign variants
P35573	4	12	16	genes with either less than 5 and or benign variants
P35575	18	0	18	genes with only pathogenic variants
P35579	12	18	30	genes with at least 5 pathogenic and benign variants
P35609	6	6	12	genes with at least 5 pathogenic and benign variants
P35625	4	1	5	genes with either less than 5 and or benign variants
P35637	8	3	11	genes with either less than 5 and or benign variants
P35670	91	15	106	genes with at least 5 pathogenic and benign variants
P35680	0	2	2	genes with only benign variants
P35711	4	0	4	genes with only pathogenic variants
P35716	4	0	4	genes with only pathogenic variants
P35749	2	25	27	genes with either less than 5 and or benign variants
P35858	1	4	5	genes with either less than 5 and or benign variants
P35908	3	17	20	genes with either less than 5 and or benign variants
P35913	11	3	14	genes with either less than 5 and or benign variants
P35914	3	1	4	genes with either less than 5 and or benign variants
P35916	2	13	15	genes with either less than 5 and or benign variants
P35968	1	1	2	genes with either less than 5 and or benign variants
P36021	10	5	15	genes with at least 5 pathogenic and benign variants
P36405	2	0	2	genes with only pathogenic variants
P36507	12	13	25	genes with at least 5 pathogenic and benign variants
P36543	1	1	2	genes with either less than 5 and or benign variants
P36544	0	1	1	genes with only benign variants
P36551	2	8	10	genes with either less than 5 and or benign variants
P36776	2	7	9	genes with either less than 5 and or benign variants
P36871	2	3	5	genes with either less than 5 and or benign variants
P36888	0	2	2	genes with only benign variants
P36894	12	0	12	genes with only pathogenic variants
P36897	25	3	28	genes with either less than 5 and or benign variants
P36955	0	4	4	genes with only benign variants
P36956	2	0	2	genes with only pathogenic variants
P37023	53	3	56	genes with either less than 5 and or benign variants
P37058	7	1	8	genes with either less than 5 and or benign variants
P37088	1	4	5	genes with either less than 5 and or benign variants
P37173	41	6	47	genes with at least 5 pathogenic and benign variants
P37198	0	2	2	genes with only benign variants
P37231	6	1	7	genes with either less than 5 and or benign variants
P37275	1	0	1	genes with only pathogenic variants
P37287	9	5	14	genes with at least 5 pathogenic and benign variants
P37837	1	1	2	genes with either less than 5 and or benign variants
P37840	2	1	3	genes with either less than 5 and or benign variants
P38117	2	2	4	genes with either less than 5 and or benign variants
P38398	120	181	301	genes with at least 5 pathogenic and benign variants
P38405	1	0	1	genes with only pathogenic variants
P38435	0	2	2	genes with only benign variants
P38484	0	3	3	genes with only benign variants
P38571	37	2	39	genes with either less than 5 and or benign variants
P38606	2	0	2	genes with only pathogenic variants
P38646	1	0	1	genes with only pathogenic variants
P38935	16	16	32	genes with at least 5 pathogenic and benign variants
P39019	7	0	7	genes with only pathogenic variants
P39060	0	23	23	genes with only benign variants
P39210	8	0	8	genes with only pathogenic variants
P39656	1	2	3	genes with either less than 5 and or benign variants
P39880	0	1	1	genes with only benign variants
P39905	0	3	3	genes with only benign variants
P40200	0	1	1	genes with only benign variants
P40225	2	2	4	genes with either less than 5 and or benign variants
P40238	11	6	17	genes with at least 5 pathogenic and benign variants
P40337	90	4	94	genes with either less than 5 and or benign variants
P40424	4	0	4	genes with only pathogenic variants
P40692	117	33	150	genes with at least 5 pathogenic and benign variants
P40763	41	2	43	genes with either less than 5 and or benign variants
P40879	0	12	12	genes with only benign variants
P40926	1	1	2	genes with either less than 5 and or benign variants
P40939	8	3	11	genes with either less than 5 and or benign variants
P40967	0	1	1	genes with only benign variants
P41159	1	0	1	genes with only pathogenic variants
P41180	52	9	61	genes with at least 5 pathogenic and benign variants
P41181	9	0	9	genes with only pathogenic variants
P41212	2	1	3	genes with either less than 5 and or benign variants
P41219	0	2	2	genes with only benign variants
P41225	0	4	4	genes with only benign variants
P41227	7	0	7	genes with only pathogenic variants
P41229	8	7	15	genes with at least 5 pathogenic and benign variants
P41235	6	1	7	genes with either less than 5 and or benign variants
P41250	10	8	18	genes with at least 5 pathogenic and benign variants
P41732	0	1	1	genes with only benign variants
P42126	0	1	1	genes with only benign variants
P42166	0	20	20	genes with only benign variants
P42224	21	1	22	genes with either less than 5 and or benign variants
P42261	1	0	1	genes with only pathogenic variants
P42262	6	0	6	genes with only pathogenic variants
P42263	3	3	6	genes with either less than 5 and or benign variants
P42336	31	2	33	genes with either less than 5 and or benign variants
P42345	19	16	35	genes with at least 5 pathogenic and benign variants
P42356	1	0	1	genes with only pathogenic variants
P42658	0	1	1	genes with only benign variants
P42701	2	12	14	genes with either less than 5 and or benign variants
P42702	0	8	8	genes with only benign variants
P42704	5	17	22	genes with at least 5 pathogenic and benign variants
P42768	16	4	20	genes with either less than 5 and or benign variants
P42771	29	4	33	genes with either less than 5 and or benign variants
P42858	0	1	1	genes with only benign variants
P42892	0	2	2	genes with only benign variants
P42898	13	1	14	genes with either less than 5 and or benign variants
P43003	0	8	8	genes with only benign variants
P43004	2	1	3	genes with either less than 5 and or benign variants
P43005	0	1	1	genes with only benign variants
P43007	2	0	2	genes with only pathogenic variants
P43026	1	7	8	genes with either less than 5 and or benign variants
P43034	26	0	26	genes with only pathogenic variants
P43080	11	0	11	genes with only pathogenic variants
P43146	0	1	1	genes with only benign variants
P43155	1	1	2	genes with either less than 5 and or benign variants
P43235	5	0	5	genes with only pathogenic variants
P43243	1	3	4	genes with either less than 5 and or benign variants
P43246	73	28	101	genes with at least 5 pathogenic and benign variants
P43251	42	2	44	genes with either less than 5 and or benign variants
P43320	3	2	5	genes with either less than 5 and or benign variants
P43403	4	2	6	genes with either less than 5 and or benign variants
P43405	2	0	2	genes with only pathogenic variants
P43681	3	32	35	genes with either less than 5 and or benign variants
P43694	2	6	8	genes with either less than 5 and or benign variants
P43699	6	4	10	genes with either less than 5 and or benign variants
P43897	2	4	6	genes with either less than 5 and or benign variants
P45378	2	0	2	genes with only pathogenic variants
P45379	32	2	34	genes with either less than 5 and or benign variants
P45381	24	1	25	genes with either less than 5 and or benign variants
P45452	4	3	7	genes with either less than 5 and or benign variants
P45954	1	3	4	genes with either less than 5 and or benign variants
P46019	8	12	20	genes with at least 5 pathogenic and benign variants
P46020	0	13	13	genes with only benign variants
P46063	0	6	6	genes with only benign variants
P46100	20	33	53	genes with at least 5 pathogenic and benign variants
P46199	1	0	1	genes with only pathogenic variants
P46527	0	2	2	genes with only benign variants
P46531	8	37	45	genes with at least 5 pathogenic and benign variants
P46597	0	1	1	genes with only benign variants
P46777	0	2	2	genes with only benign variants
P46783	0	2	2	genes with only benign variants
P46976	0	2	2	genes with only benign variants
P47755	1	0	1	genes with only pathogenic variants
P47804	0	1	1	genes with only benign variants
P47870	14	7	21	genes with at least 5 pathogenic and benign variants
P47895	0	2	2	genes with only benign variants
P47897	3	4	7	genes with either less than 5 and or benign variants
P47985	1	0	1	genes with only pathogenic variants
P47989	0	14	14	genes with only benign variants
P48029	8	10	18	genes with at least 5 pathogenic and benign variants
P48039	0	1	1	genes with only benign variants
P48048	2	4	6	genes with either less than 5 and or benign variants
P48058	2	0	2	genes with only pathogenic variants
P48067	1	0	1	genes with only pathogenic variants
P48165	8	8	16	genes with at least 5 pathogenic and benign variants
P48167	0	4	4	genes with only benign variants
P48201	1	0	1	genes with only pathogenic variants
P48357	3	3	6	genes with either less than 5 and or benign variants
P48382	0	5	5	genes with only benign variants
P48431	3	1	4	genes with either less than 5 and or benign variants
P48436	12	0	12	genes with only pathogenic variants
P48449	0	5	5	genes with only benign variants
P48506	1	0	1	genes with only pathogenic variants
P48544	0	4	4	genes with only benign variants
P48547	4	2	6	genes with either less than 5 and or benign variants
P48551	0	1	1	genes with only benign variants
P48552	0	1	1	genes with only benign variants
P48637	4	1	5	genes with either less than 5 and or benign variants
P48643	0	2	2	genes with only benign variants
P48651	2	1	3	genes with either less than 5 and or benign variants
P48668	1	0	1	genes with only pathogenic variants
P48681	0	1	1	genes with only benign variants
P48728	14	1	15	genes with either less than 5 and or benign variants
P48735	2	3	5	genes with either less than 5 and or benign variants
P48736	0	1	1	genes with only benign variants
P48740	0	2	2	genes with only benign variants
P48764	2	0	2	genes with only pathogenic variants
P48788	2	0	2	genes with only pathogenic variants
P49247	1	1	2	genes with either less than 5 and or benign variants
P49257	0	3	3	genes with only benign variants
P49281	0	4	4	genes with only benign variants
P49327	0	2	2	genes with only benign variants
P49335	4	1	5	genes with either less than 5 and or benign variants
P49336	2	0	2	genes with only pathogenic variants
P49366	1	0	1	genes with only pathogenic variants
P49411	2	1	3	genes with either less than 5 and or benign variants
P49419	23	6	29	genes with at least 5 pathogenic and benign variants
P49454	0	17	17	genes with only benign variants
P49459	3	0	3	genes with only pathogenic variants
P49585	7	0	7	genes with only pathogenic variants
P49588	3	7	10	genes with either less than 5 and or benign variants
P49589	1	0	1	genes with only pathogenic variants
P49590	0	5	5	genes with only benign variants
P49591	1	0	1	genes with only pathogenic variants
P49638	3	0	3	genes with only pathogenic variants
P49639	0	1	1	genes with only benign variants
P49675	9	0	9	genes with only pathogenic variants
P49711	7	5	12	genes with at least 5 pathogenic and benign variants
P49736	1	8	9	genes with either less than 5 and or benign variants
P49747	23	5	28	genes with at least 5 pathogenic and benign variants
P49748	40	5	45	genes with at least 5 pathogenic and benign variants
P49767	0	2	2	genes with only benign variants
P49768	50	1	51	genes with either less than 5 and or benign variants
P49770	8	1	9	genes with either less than 5 and or benign variants
P49773	5	0	5	genes with only pathogenic variants
P49792	1	15	16	genes with either less than 5 and or benign variants
P49810	2	5	7	genes with either less than 5 and or benign variants
P49815	78	119	197	genes with at least 5 pathogenic and benign variants
P49821	13	2	15	genes with either less than 5 and or benign variants
P49848	1	1	2	genes with either less than 5 and or benign variants
P49902	0	1	1	genes with only benign variants
P49914	1	0	1	genes with only pathogenic variants
P49916	0	9	9	genes with only benign variants
P49917	7	6	13	genes with at least 5 pathogenic and benign variants
P49918	4	1	5	genes with either less than 5 and or benign variants
P49959	2	16	18	genes with either less than 5 and or benign variants
P49961	0	1	1	genes with only benign variants
P50052	0	3	3	genes with only benign variants
P50053	0	3	3	genes with only benign variants
P50221	0	2	2	genes with only benign variants
P50336	2	1	3	genes with either less than 5 and or benign variants
P50402	4	4	8	genes with either less than 5 and or benign variants
P50416	9	6	15	genes with at least 5 pathogenic and benign variants
P50443	5	2	7	genes with either less than 5 and or benign variants
P50454	0	1	1	genes with only benign variants
P50461	1	2	3	genes with either less than 5 and or benign variants
P50542	2	2	4	genes with either less than 5 and or benign variants
P50548	2	2	4	genes with either less than 5 and or benign variants
P50570	22	8	30	genes with at least 5 pathogenic and benign variants
P50747	7	11	18	genes with at least 5 pathogenic and benign variants
P50851	1	13	14	genes with either less than 5 and or benign variants
P50897	15	3	18	genes with either less than 5 and or benign variants
P50993	28	6	34	genes with at least 5 pathogenic and benign variants
P50995	3	0	3	genes with only pathogenic variants
P51149	2	0	2	genes with only pathogenic variants
P51159	1	0	1	genes with only pathogenic variants
P51160	5	4	9	genes with either less than 5 and or benign variants
P51168	3	6	9	genes with either less than 5 and or benign variants
P51170	0	3	3	genes with only benign variants
P51451	0	14	14	genes with only benign variants
P51508	0	7	7	genes with only benign variants
P51530	2	5	7	genes with either less than 5 and or benign variants
P51531	36	17	53	genes with at least 5 pathogenic and benign variants
P51532	23	5	28	genes with at least 5 pathogenic and benign variants
P51570	3	0	3	genes with only pathogenic variants
P51587	61	241	302	genes with at least 5 pathogenic and benign variants
P51608	53	59	112	genes with at least 5 pathogenic and benign variants
P51610	4	13	17	genes with either less than 5 and or benign variants
P51648	9	3	12	genes with either less than 5 and or benign variants
P51649	6	8	14	genes with at least 5 pathogenic and benign variants
P51654	1	12	13	genes with either less than 5 and or benign variants
P51659	9	9	18	genes with at least 5 pathogenic and benign variants
P51687	4	3	7	genes with either less than 5 and or benign variants
P51688	29	8	37	genes with at least 5 pathogenic and benign variants
P51690	7	6	13	genes with at least 5 pathogenic and benign variants
P51787	146	10	156	genes with at least 5 pathogenic and benign variants
P51788	1	8	9	genes with either less than 5 and or benign variants
P51790	1	0	1	genes with only pathogenic variants
P51793	7	4	11	genes with either less than 5 and or benign variants
P51795	4	7	11	genes with either less than 5 and or benign variants
P51798	6	2	8	genes with either less than 5 and or benign variants
P51800	0	2	2	genes with only benign variants
P51805	0	2	2	genes with only benign variants
P51810	4	2	6	genes with either less than 5 and or benign variants
P51812	11	3	14	genes with either less than 5 and or benign variants
P51814	0	3	3	genes with only benign variants
P51816	1	8	9	genes with either less than 5 and or benign variants
P51826	1	0	1	genes with only pathogenic variants
P51843	4	1	5	genes with either less than 5 and or benign variants
P51993	0	2	2	genes with only benign variants
P52179	0	25	25	genes with only benign variants
P52333	7	3	10	genes with either less than 5 and or benign variants
P52429	1	2	3	genes with either less than 5 and or benign variants
P52630	0	2	2	genes with only benign variants
P52701	32	30	62	genes with at least 5 pathogenic and benign variants
P52732	3	8	11	genes with either less than 5 and or benign variants
P52747	0	1	1	genes with only benign variants
P52788	5	1	6	genes with either less than 5 and or benign variants
P52824	0	1	1	genes with only benign variants
P52848	2	1	3	genes with either less than 5 and or benign variants
P52945	5	2	7	genes with either less than 5 and or benign variants
P52952	5	4	9	genes with either less than 5 and or benign variants
P53007	2	0	2	genes with only pathogenic variants
P53420	36	14	50	genes with at least 5 pathogenic and benign variants
P53597	5	0	5	genes with only pathogenic variants
P53621	4	0	4	genes with only pathogenic variants
P53634	2	2	4	genes with either less than 5 and or benign variants
P53673	0	2	2	genes with only benign variants
P53674	0	2	2	genes with only benign variants
P53675	1	1	2	genes with either less than 5 and or benign variants
P53680	3	0	3	genes with only pathogenic variants
P53701	0	2	2	genes with only benign variants
P53985	0	1	1	genes with only benign variants
P54098	77	15	92	genes with at least 5 pathogenic and benign variants
P54132	4	13	17	genes with either less than 5 and or benign variants
P54136	7	3	10	genes with either less than 5 and or benign variants
P54252	0	1	1	genes with only benign variants
P54253	0	1	1	genes with only benign variants
P54277	0	3	3	genes with only benign variants
P54278	13	25	38	genes with at least 5 pathogenic and benign variants
P54289	0	5	5	genes with only benign variants
P54577	2	5	7	genes with either less than 5 and or benign variants
P54760	6	3	9	genes with either less than 5 and or benign variants
P54802	27	3	30	genes with either less than 5 and or benign variants
P54803	28	3	31	genes with either less than 5 and or benign variants
P54819	3	1	4	genes with either less than 5 and or benign variants
P54840	4	13	17	genes with either less than 5 and or benign variants
P54845	2	0	2	genes with only pathogenic variants
P54868	3	2	5	genes with either less than 5 and or benign variants
P54886	9	3	12	genes with either less than 5 and or benign variants
P55000	2	0	2	genes with only pathogenic variants
P55011	1	0	1	genes with only pathogenic variants
P55017	46	8	54	genes with at least 5 pathogenic and benign variants
P55072	16	2	18	genes with either less than 5 and or benign variants
P55075	1	0	1	genes with only pathogenic variants
P55084	12	1	13	genes with either less than 5 and or benign variants
P55157	2	13	15	genes with either less than 5 and or benign variants
P55160	4	0	4	genes with only pathogenic variants
P55201	2	0	2	genes with only pathogenic variants
P55263	1	0	1	genes with only pathogenic variants
P55265	2	6	8	genes with either less than 5 and or benign variants
P55268	1	18	19	genes with either less than 5 and or benign variants
P55287	0	1	1	genes with only benign variants
P55290	0	2	2	genes with only benign variants
P55291	0	15	15	genes with only benign variants
P55316	39	20	59	genes with at least 5 pathogenic and benign variants
P55344	1	0	1	genes with only pathogenic variants
P55771	2	2	4	genes with either less than 5 and or benign variants
P55789	2	5	7	genes with either less than 5 and or benign variants
P55795	4	0	4	genes with only pathogenic variants
P55809	2	3	5	genes with either less than 5 and or benign variants
P55851	0	5	5	genes with only benign variants
P55895	22	3	25	genes with either less than 5 and or benign variants
P56192	0	2	2	genes with only benign variants
P56524	3	2	5	genes with either less than 5 and or benign variants
P56539	6	1	7	genes with either less than 5 and or benign variants
P56556	0	1	1	genes with only benign variants
P56589	1	1	2	genes with either less than 5 and or benign variants
P56645	2	0	2	genes with only pathogenic variants
P56693	7	2	9	genes with either less than 5 and or benign variants
P56696	8	6	14	genes with at least 5 pathogenic and benign variants
P56706	1	0	1	genes with only pathogenic variants
P56715	5	16	21	genes with at least 5 pathogenic and benign variants
P56730	0	6	6	genes with only benign variants
P56915	0	1	1	genes with only benign variants
P57054	1	0	1	genes with only pathogenic variants
P57059	0	22	22	genes with only benign variants
P57071	1	0	1	genes with only pathogenic variants
P57076	0	1	1	genes with only benign variants
P57078	0	5	5	genes with only benign variants
P57081	2	0	2	genes with only pathogenic variants
P57082	0	13	13	genes with only benign variants
P57678	1	4	5	genes with either less than 5 and or benign variants
P57679	2	21	23	genes with either less than 5 and or benign variants
P57740	3	0	3	genes with only pathogenic variants
P57775	0	2	2	genes with only benign variants
P57796	0	2	2	genes with only benign variants
P58012	10	2	12	genes with either less than 5 and or benign variants
P58215	0	4	4	genes with only benign variants
P58304	3	1	4	genes with either less than 5 and or benign variants
P58335	4	4	8	genes with either less than 5 and or benign variants
P58418	7	0	7	genes with only pathogenic variants
P58743	0	5	5	genes with only benign variants
P58753	0	1	1	genes with only benign variants
P59046	0	25	25	genes with only benign variants
P59047	0	1	1	genes with only benign variants
P59910	0	1	1	genes with only benign variants
P60014	0	2	2	genes with only benign variants
P60174	1	0	1	genes with only pathogenic variants
P60201	12	0	12	genes with only pathogenic variants
P60331	0	1	1	genes with only benign variants
P60371	0	1	1	genes with only benign variants
P60372	0	1	1	genes with only benign variants
P60409	0	1	1	genes with only benign variants
P60484	124	1	125	genes with either less than 5 and or benign variants
P60709	36	0	36	genes with only pathogenic variants
P60763	3	0	3	genes with only pathogenic variants
P60891	10	0	10	genes with only pathogenic variants
P60953	11	0	11	genes with only pathogenic variants
P61011	1	0	1	genes with only pathogenic variants
P61073	0	1	1	genes with only benign variants
P61244	2	0	2	genes with only pathogenic variants
P61266	2	0	2	genes with only pathogenic variants
P61328	2	0	2	genes with only pathogenic variants
P61586	1	0	1	genes with only pathogenic variants
P61619	1	0	1	genes with only pathogenic variants
P61626	1	5	6	genes with either less than 5 and or benign variants
P61764	41	8	49	genes with at least 5 pathogenic and benign variants
P61769	1	0	1	genes with only pathogenic variants
P61812	12	3	15	genes with either less than 5 and or benign variants
P61916	1	1	2	genes with either less than 5 and or benign variants
P61978	6	1	7	genes with either less than 5 and or benign variants
P61981	4	0	4	genes with only pathogenic variants
P62070	2	0	2	genes with only pathogenic variants
P62140	6	0	6	genes with only pathogenic variants
P62736	17	0	17	genes with only pathogenic variants
P62841	0	1	1	genes with only benign variants
P62847	2	1	3	genes with either less than 5 and or benign variants
P62854	3	0	3	genes with only pathogenic variants
P62873	17	0	17	genes with only pathogenic variants
P62879	1	0	1	genes with only pathogenic variants
P63000	3	0	3	genes with only pathogenic variants
P63027	2	0	2	genes with only pathogenic variants
P63096	2	0	2	genes with only pathogenic variants
P63252	37	1	38	genes with either less than 5 and or benign variants
P63261	29	1	30	genes with either less than 5 and or benign variants
P63267	15	0	15	genes with only pathogenic variants
P63316	6	0	6	genes with only pathogenic variants
P67870	2	0	2	genes with only pathogenic variants
P68032	13	0	13	genes with only pathogenic variants
P68133	41	0	41	genes with only pathogenic variants
P68366	0	1	1	genes with only benign variants
P68371	1	0	1	genes with only pathogenic variants
P68400	7	0	7	genes with only pathogenic variants
P68871	46	19	65	genes with at least 5 pathogenic and benign variants
P69891	0	3	3	genes with only benign variants
P69905	23	23	46	genes with at least 5 pathogenic and benign variants
P78314	3	13	16	genes with either less than 5 and or benign variants
P78318	0	2	2	genes with only benign variants
P78330	0	8	8	genes with only benign variants
P78337	0	1	1	genes with only benign variants
P78357	0	1	1	genes with only benign variants
P78363	221	7	228	genes with at least 5 pathogenic and benign variants
P78364	0	2	2	genes with only benign variants
P78367	0	2	2	genes with only benign variants
P78381	5	1	6	genes with either less than 5 and or benign variants
P78382	0	1	1	genes with only benign variants
P78385	1	22	23	genes with either less than 5 and or benign variants
P78386	0	2	2	genes with only benign variants
P78504	11	13	24	genes with at least 5 pathogenic and benign variants
P78508	6	2	8	genes with either less than 5 and or benign variants
P78509	3	24	27	genes with either less than 5 and or benign variants
P78527	0	17	17	genes with only benign variants
P78536	0	2	2	genes with only benign variants
P78560	1	2	3	genes with either less than 5 and or benign variants
P78562	60	6	66	genes with at least 5 pathogenic and benign variants
P80365	2	1	3	genes with either less than 5 and or benign variants
P80404	7	1	8	genes with either less than 5 and or benign variants
P81133	1	5	6	genes with either less than 5 and or benign variants
P81172	0	1	1	genes with only benign variants
P81274	0	5	5	genes with only benign variants
P82251	6	2	8	genes with either less than 5 and or benign variants
P82279	52	4	56	genes with either less than 5 and or benign variants
P82650	0	3	3	genes with only benign variants
P82930	1	1	2	genes with either less than 5 and or benign variants
P82987	0	1	1	genes with only benign variants
P83436	0	3	3	genes with only benign variants
P84022	14	2	16	genes with either less than 5 and or benign variants
P84074	1	0	1	genes with only pathogenic variants
P84077	2	0	2	genes with only pathogenic variants
P84243	4	0	4	genes with only pathogenic variants
P98155	1	3	4	genes with either less than 5 and or benign variants
P98160	2	56	58	genes with either less than 5 and or benign variants
P98161	43	95	138	genes with at least 5 pathogenic and benign variants
P98164	1	43	44	genes with either less than 5 and or benign variants
P98170	0	2	2	genes with only benign variants
P98172	8	2	10	genes with either less than 5 and or benign variants
P98174	6	6	12	genes with at least 5 pathogenic and benign variants
P98175	1	0	1	genes with only pathogenic variants
P98194	1	4	5	genes with either less than 5 and or benign variants
P99999	1	0	1	genes with only pathogenic variants
Q00059	1	1	2	genes with either less than 5 and or benign variants
Q00266	14	0	14	genes with only pathogenic variants
Q00325	0	2	2	genes with only benign variants
Q00534	0	1	1	genes with only benign variants
Q00577	22	0	22	genes with only pathogenic variants
Q00597	1	6	7	genes with either less than 5 and or benign variants
Q00604	7	1	8	genes with either less than 5 and or benign variants
Q00610	1	0	1	genes with only pathogenic variants
Q00653	1	2	3	genes with either less than 5 and or benign variants
Q00796	1	1	2	genes with either less than 5 and or benign variants
Q00839	1	7	8	genes with either less than 5 and or benign variants
Q00872	4	11	15	genes with either less than 5 and or benign variants
Q00973	1	4	5	genes with either less than 5 and or benign variants
Q00975	0	3	3	genes with only benign variants
Q01105	1	0	1	genes with only pathogenic variants
Q01118	0	2	2	genes with only benign variants
Q01196	19	14	33	genes with at least 5 pathogenic and benign variants
Q01432	1	1	2	genes with either less than 5 and or benign variants
Q01433	4	0	4	genes with only pathogenic variants
Q01453	18	1	19	genes with either less than 5 and or benign variants
Q01484	1	42	43	genes with either less than 5 and or benign variants
Q01543	5	1	6	genes with either less than 5 and or benign variants
Q01668	2	6	8	genes with either less than 5 and or benign variants
Q01718	2	4	6	genes with either less than 5 and or benign variants
Q01814	1	1	2	genes with either less than 5 and or benign variants
Q01826	2	0	2	genes with only pathogenic variants
Q01831	0	11	11	genes with only benign variants
Q01954	1	0	1	genes with only pathogenic variants
Q01955	43	17	60	genes with at least 5 pathogenic and benign variants
Q01959	2	0	2	genes with only pathogenic variants
Q01968	11	6	17	genes with at least 5 pathogenic and benign variants
Q01974	1	7	8	genes with either less than 5 and or benign variants
Q02078	0	1	1	genes with only benign variants
Q02094	0	1	1	genes with only benign variants
Q02127	2	2	4	genes with either less than 5 and or benign variants
Q02156	1	0	1	genes with only pathogenic variants
Q02221	2	0	2	genes with only pathogenic variants
Q02224	2	9	11	genes with either less than 5 and or benign variants
Q02246	0	1	1	genes with only benign variants
Q02252	0	2	2	genes with only benign variants
Q02318	11	5	16	genes with at least 5 pathogenic and benign variants
Q02388	96	16	112	genes with at least 5 pathogenic and benign variants
Q02413	1	4	5	genes with either less than 5 and or benign variants
Q02487	2	15	17	genes with either less than 5 and or benign variants
Q02548	0	5	5	genes with only benign variants
Q02643	1	5	6	genes with either less than 5 and or benign variants
Q02750	18	1	19	genes with either less than 5 and or benign variants
Q02763	5	21	26	genes with at least 5 pathogenic and benign variants
Q02809	2	9	11	genes with either less than 5 and or benign variants
Q02846	19	3	22	genes with either less than 5 and or benign variants
Q02962	4	0	4	genes with only pathogenic variants
Q02985	0	1	1	genes with only benign variants
Q03001	0	12	12	genes with only benign variants
Q03112	1	1	2	genes with either less than 5 and or benign variants
Q03135	0	1	1	genes with only benign variants
Q03154	1	1	2	genes with either less than 5 and or benign variants
Q03164	20	29	49	genes with at least 5 pathogenic and benign variants
Q03167	0	4	4	genes with only benign variants
Q03252	0	2	2	genes with only benign variants
Q03393	16	1	17	genes with either less than 5 and or benign variants
Q03395	0	3	3	genes with only benign variants
Q03426	18	2	20	genes with either less than 5 and or benign variants
Q03431	1	4	5	genes with either less than 5 and or benign variants
Q03468	6	18	24	genes with at least 5 pathogenic and benign variants
Q03519	0	3	3	genes with only benign variants
Q03692	7	14	21	genes with at least 5 pathogenic and benign variants
Q04446	10	8	18	genes with at least 5 pathogenic and benign variants
Q04656	24	30	54	genes with at least 5 pathogenic and benign variants
Q04671	13	8	21	genes with at least 5 pathogenic and benign variants
Q04695	6	0	6	genes with only pathogenic variants
Q04721	2	24	26	genes with either less than 5 and or benign variants
Q04759	0	1	1	genes with only benign variants
Q04771	3	2	5	genes with either less than 5 and or benign variants
Q04837	1	0	1	genes with only pathogenic variants
Q04844	10	3	13	genes with either less than 5 and or benign variants
Q04900	0	4	4	genes with only benign variants
Q04912	0	1	1	genes with only benign variants
Q05086	15	7	22	genes with at least 5 pathogenic and benign variants
Q05193	22	10	32	genes with at least 5 pathogenic and benign variants
Q05469	0	4	4	genes with only benign variants
Q05586	25	2	27	genes with either less than 5 and or benign variants
Q05639	14	2	16	genes with either less than 5 and or benign variants
Q05655	0	1	1	genes with only benign variants
Q05707	0	2	2	genes with only benign variants
Q05940	1	0	1	genes with only pathogenic variants
Q06124	99	8	107	genes with at least 5 pathogenic and benign variants
Q06187	6	1	7	genes with either less than 5 and or benign variants
Q06210	3	0	3	genes with only pathogenic variants
Q06330	1	0	1	genes with only pathogenic variants
Q06413	13	3	16	genes with either less than 5 and or benign variants
Q06495	2	10	12	genes with either less than 5 and or benign variants
Q06609	2	1	3	genes with either less than 5 and or benign variants
Q06710	2	2	4	genes with either less than 5 and or benign variants
Q06787	2	2	4	genes with either less than 5 and or benign variants
Q06945	2	1	3	genes with either less than 5 and or benign variants
Q07001	1	2	3	genes with either less than 5 and or benign variants
Q07011	0	1	1	genes with only benign variants
Q07021	1	0	1	genes with only pathogenic variants
Q07617	0	1	1	genes with only benign variants
Q07666	1	0	1	genes with only pathogenic variants
Q07699	2	3	5	genes with either less than 5 and or benign variants
Q07837	3	1	4	genes with either less than 5 and or benign variants
Q07864	2	25	27	genes with either less than 5 and or benign variants
Q07889	40	27	67	genes with at least 5 pathogenic and benign variants
Q07890	4	17	21	genes with either less than 5 and or benign variants
Q07912	0	4	4	genes with only benign variants
Q07973	1	5	6	genes with either less than 5 and or benign variants
Q08209	2	1	3	genes with either less than 5 and or benign variants
Q08289	1	6	7	genes with either less than 5 and or benign variants
Q08357	5	8	13	genes with at least 5 pathogenic and benign variants
Q08426	0	9	9	genes with only benign variants
Q08499	4	4	8	genes with either less than 5 and or benign variants
Q08828	0	3	3	genes with only benign variants
Q08881	0	2	2	genes with only benign variants
Q08J23	1	4	5	genes with either less than 5 and or benign variants
Q09013	0	2	2	genes with only benign variants
Q09428	36	2	38	genes with either less than 5 and or benign variants
Q09470	8	2	10	genes with either less than 5 and or benign variants
Q09472	9	24	33	genes with at least 5 pathogenic and benign variants
Q0D2K0	3	3	6	genes with either less than 5 and or benign variants
Q0GE19	1	0	1	genes with only pathogenic variants
Q0IIM8	2	0	2	genes with only pathogenic variants
Q0VAK6	2	12	14	genes with either less than 5 and or benign variants
Q0VDD8	0	2	2	genes with only benign variants
Q0VG99	0	4	4	genes with only benign variants
Q0ZGT2	1	8	9	genes with either less than 5 and or benign variants
Q0ZLH3	1	3	4	genes with either less than 5 and or benign variants
Q10471	2	0	2	genes with only pathogenic variants
Q10713	1	0	1	genes with only pathogenic variants
Q10981	0	1	1	genes with only benign variants
Q11203	1	0	1	genes with only pathogenic variants
Q12756	48	0	48	genes with only pathogenic variants
Q12768	7	5	12	genes with at least 5 pathogenic and benign variants
Q12772	0	1	1	genes with only benign variants
Q12791	5	2	7	genes with either less than 5 and or benign variants
Q12794	0	4	4	genes with only benign variants
Q12805	1	2	3	genes with either less than 5 and or benign variants
Q12809	136	11	147	genes with at least 5 pathogenic and benign variants
Q12824	8	1	9	genes with either less than 5 and or benign variants
Q12840	11	4	15	genes with either less than 5 and or benign variants
Q12857	3	0	3	genes with only pathogenic variants
Q12860	0	4	4	genes with only benign variants
Q12866	8	7	15	genes with at least 5 pathogenic and benign variants
Q12873	19	1	20	genes with either less than 5 and or benign variants
Q12879	38	30	68	genes with at least 5 pathogenic and benign variants
Q12882	2	0	2	genes with only pathogenic variants
Q12887	2	6	8	genes with either less than 5 and or benign variants
Q12904	0	2	2	genes with only benign variants
Q12908	0	2	2	genes with only benign variants
Q12913	0	2	2	genes with only benign variants
Q12929	0	9	9	genes with only benign variants
Q12931	0	4	4	genes with only benign variants
Q12934	0	7	7	genes with only benign variants
Q12946	1	1	2	genes with either less than 5 and or benign variants
Q12948	5	1	6	genes with either less than 5 and or benign variants
Q12955	0	9	9	genes with only benign variants
Q12965	0	3	3	genes with only benign variants
Q12980	0	7	7	genes with only benign variants
Q12988	0	4	4	genes with only benign variants
Q13002	2	2	4	genes with either less than 5 and or benign variants
Q13029	0	1	1	genes with only benign variants
Q13049	1	0	1	genes with only pathogenic variants
Q13057	1	3	4	genes with either less than 5 and or benign variants
Q13061	0	17	17	genes with only benign variants
Q13093	0	1	1	genes with only benign variants
Q13099	0	1	1	genes with only benign variants
Q13126	0	5	5	genes with only benign variants
Q13127	0	3	3	genes with only benign variants
Q13144	20	2	22	genes with either less than 5 and or benign variants
Q13148	11	0	11	genes with only pathogenic variants
Q13153	6	0	6	genes with only pathogenic variants
Q13158	1	0	1	genes with only pathogenic variants
Q13207	1	0	1	genes with only pathogenic variants
Q13216	4	1	5	genes with either less than 5 and or benign variants
Q13217	0	1	1	genes with only benign variants
Q13224	44	23	67	genes with at least 5 pathogenic and benign variants
Q13228	2	0	2	genes with only pathogenic variants
Q13231	0	4	4	genes with only benign variants
Q13233	2	3	5	genes with either less than 5 and or benign variants
Q13253	3	2	5	genes with either less than 5 and or benign variants
Q13255	0	8	8	genes with only benign variants
Q13285	7	2	9	genes with either less than 5 and or benign variants
Q13286	7	2	9	genes with either less than 5 and or benign variants
Q13315	44	41	85	genes with at least 5 pathogenic and benign variants
Q13316	1	6	7	genes with either less than 5 and or benign variants
Q13322	0	1	1	genes with only benign variants
Q13326	4	1	5	genes with either less than 5 and or benign variants
Q13351	1	9	10	genes with either less than 5 and or benign variants
Q13361	0	2	2	genes with only benign variants
Q13363	1	0	1	genes with only pathogenic variants
Q13393	1	0	1	genes with only pathogenic variants
Q13402	72	15	87	genes with at least 5 pathogenic and benign variants
Q13409	1	0	1	genes with only pathogenic variants
Q13415	2	11	13	genes with either less than 5 and or benign variants
Q13418	0	3	3	genes with only benign variants
Q13422	9	0	9	genes with only pathogenic variants
Q13423	2	1	3	genes with either less than 5 and or benign variants
Q13424	0	6	6	genes with only benign variants
Q13426	1	0	1	genes with only pathogenic variants
Q13428	1	42	43	genes with either less than 5 and or benign variants
Q13432	0	1	1	genes with only benign variants
Q13443	0	4	4	genes with only benign variants
Q13454	1	1	2	genes with either less than 5 and or benign variants
Q13459	0	1	1	genes with only benign variants
Q13461	7	7	14	genes with at least 5 pathogenic and benign variants
Q13474	0	1	1	genes with only benign variants
Q13480	1	0	1	genes with only pathogenic variants
Q13485	16	5	21	genes with at least 5 pathogenic and benign variants
Q13488	2	7	9	genes with either less than 5 and or benign variants
Q13495	0	1	1	genes with only benign variants
Q13496	50	4	54	genes with either less than 5 and or benign variants
Q13501	1	6	7	genes with either less than 5 and or benign variants
Q13509	21	4	25	genes with either less than 5 and or benign variants
Q13510	11	5	16	genes with at least 5 pathogenic and benign variants
Q13515	0	10	10	genes with only benign variants
Q13535	0	12	12	genes with only benign variants
Q13547	1	0	1	genes with only pathogenic variants
Q13554	4	0	4	genes with only pathogenic variants
Q13555	1	0	1	genes with only pathogenic variants
Q13562	0	2	2	genes with only benign variants
Q13563	9	5	14	genes with at least 5 pathogenic and benign variants
Q13586	2	3	5	genes with either less than 5 and or benign variants
Q13588	1	0	1	genes with only pathogenic variants
Q13608	13	12	25	genes with at least 5 pathogenic and benign variants
Q13609	0	1	1	genes with only benign variants
Q13614	0	5	5	genes with only benign variants
Q13618	1	1	2	genes with either less than 5 and or benign variants
Q13620	5	3	8	genes with either less than 5 and or benign variants
Q13621	1	4	5	genes with either less than 5 and or benign variants
Q13627	12	16	28	genes with at least 5 pathogenic and benign variants
Q13635	18	39	57	genes with at least 5 pathogenic and benign variants
Q13642	5	5	10	genes with at least 5 pathogenic and benign variants
Q13651	1	10	11	genes with either less than 5 and or benign variants
Q13683	1	10	11	genes with either less than 5 and or benign variants
Q13698	9	42	51	genes with at least 5 pathogenic and benign variants
Q13702	7	3	10	genes with either less than 5 and or benign variants
Q13705	1	3	4	genes with either less than 5 and or benign variants
Q13724	0	9	9	genes with only benign variants
Q13751	3	20	23	genes with either less than 5 and or benign variants
Q13753	2	14	16	genes with either less than 5 and or benign variants
Q13813	6	80	86	genes with at least 5 pathogenic and benign variants
Q13825	4	3	7	genes with either less than 5 and or benign variants
Q13835	0	10	10	genes with only benign variants
Q13868	1	0	1	genes with only pathogenic variants
Q13873	12	12	24	genes with at least 5 pathogenic and benign variants
Q13885	14	1	15	genes with either less than 5 and or benign variants
Q13936	16	16	32	genes with at least 5 pathogenic and benign variants
Q13950	5	4	9	genes with either less than 5 and or benign variants
Q13976	1	2	3	genes with either less than 5 and or benign variants
Q14003	4	8	12	genes with either less than 5 and or benign variants
Q14004	9	2	11	genes with either less than 5 and or benign variants
Q14028	4	14	18	genes with either less than 5 and or benign variants
Q14031	0	14	14	genes with only benign variants
Q14032	0	5	5	genes with only benign variants
Q14050	0	19	19	genes with only benign variants
Q14055	0	16	16	genes with only benign variants
Q14108	0	4	4	genes with only benign variants
Q14117	3	3	6	genes with either less than 5 and or benign variants
Q14118	0	5	5	genes with only benign variants
Q14126	8	38	46	genes with at least 5 pathogenic and benign variants
Q14147	1	0	1	genes with only pathogenic variants
Q14191	0	8	8	genes with only benign variants
Q14192	0	3	3	genes with only benign variants
Q14203	3	21	24	genes with either less than 5 and or benign variants
Q14204	55	34	89	genes with at least 5 pathogenic and benign variants
Q14207	0	1	1	genes with only benign variants
Q14232	1	1	2	genes with either less than 5 and or benign variants
Q14315	9	33	42	genes with at least 5 pathogenic and benign variants
Q14320	3	0	3	genes with only pathogenic variants
Q14332	1	0	1	genes with only pathogenic variants
Q14353	8	2	10	genes with either less than 5 and or benign variants
Q14376	4	0	4	genes with only pathogenic variants
Q14432	1	0	1	genes with only pathogenic variants
Q14435	1	4	5	genes with either less than 5 and or benign variants
Q14442	1	0	1	genes with only pathogenic variants
Q14517	0	16	16	genes with only benign variants
Q14520	0	9	9	genes with only benign variants
Q14524	72	27	99	genes with at least 5 pathogenic and benign variants
Q14563	0	2	2	genes with only benign variants
Q14565	0	1	1	genes with only benign variants
Q14566	0	1	1	genes with only benign variants
Q14623	2	4	6	genes with either less than 5 and or benign variants
Q14626	3	1	4	genes with either less than 5 and or benign variants
Q14643	13	6	19	genes with at least 5 pathogenic and benign variants
Q14654	9	3	12	genes with either less than 5 and or benign variants
Q14671	5	0	5	genes with only pathogenic variants
Q14678	0	10	10	genes with only benign variants
Q14683	37	1	38	genes with either less than 5 and or benign variants
Q14691	1	0	1	genes with only pathogenic variants
Q14693	0	4	4	genes with only benign variants
Q14697	0	4	4	genes with only benign variants
Q14703	1	0	1	genes with only pathogenic variants
Q14721	27	23	50	genes with at least 5 pathogenic and benign variants
Q14738	11	3	14	genes with either less than 5 and or benign variants
Q14739	3	3	6	genes with either less than 5 and or benign variants
Q14746	0	2	2	genes with only benign variants
Q14767	0	6	6	genes with only benign variants
Q14790	0	3	3	genes with only benign variants
Q14807	6	3	9	genes with either less than 5 and or benign variants
Q14839	8	1	9	genes with either less than 5 and or benign variants
Q14894	0	2	2	genes with only benign variants
Q14896	33	30	63	genes with at least 5 pathogenic and benign variants
Q14938	4	0	4	genes with only pathogenic variants
Q14973	0	2	2	genes with only benign variants
Q14994	0	2	2	genes with only benign variants
Q14999	2	16	18	genes with either less than 5 and or benign variants
Q14CM0	0	4	4	genes with only benign variants
Q14CZ8	3	4	7	genes with either less than 5 and or benign variants
Q15029	6	1	7	genes with either less than 5 and or benign variants
Q15031	11	7	18	genes with at least 5 pathogenic and benign variants
Q15042	0	11	11	genes with only benign variants
Q15043	1	0	1	genes with only pathogenic variants
Q15046	3	5	8	genes with either less than 5 and or benign variants
Q15049	8	5	13	genes with at least 5 pathogenic and benign variants
Q15051	0	4	4	genes with only benign variants
Q15052	0	6	6	genes with only benign variants
Q15058	0	5	5	genes with only benign variants
Q15067	2	3	5	genes with either less than 5 and or benign variants
Q15075	0	1	1	genes with only benign variants
Q15080	0	2	2	genes with only benign variants
Q15125	18	6	24	genes with at least 5 pathogenic and benign variants
Q15126	0	1	1	genes with only benign variants
Q15139	0	1	1	genes with only benign variants
Q15147	6	15	21	genes with at least 5 pathogenic and benign variants
Q15149	2	83	85	genes with either less than 5 and or benign variants
Q15165	0	3	3	genes with only benign variants
Q15223	0	1	1	genes with only benign variants
Q15233	0	1	1	genes with only benign variants
Q15283	0	5	5	genes with only benign variants
Q15303	0	1	1	genes with only benign variants
Q15319	0	2	2	genes with only benign variants
Q15326	2	1	3	genes with either less than 5 and or benign variants
Q15327	1	4	5	genes with either less than 5 and or benign variants
Q15382	1	0	1	genes with only pathogenic variants
Q15392	3	1	4	genes with either less than 5 and or benign variants
Q15413	0	3	3	genes with only benign variants
Q15437	6	6	12	genes with at least 5 pathogenic and benign variants
Q15465	4	1	5	genes with either less than 5 and or benign variants
Q15466	0	3	3	genes with only benign variants
Q15468	1	5	6	genes with either less than 5 and or benign variants
Q15475	4	2	6	genes with either less than 5 and or benign variants
Q15477	0	9	9	genes with only benign variants
Q15517	0	2	2	genes with only benign variants
Q15526	4	4	8	genes with either less than 5 and or benign variants
Q15543	2	0	2	genes with only pathogenic variants
Q15572	0	1	1	genes with only benign variants
Q15582	6	5	11	genes with at least 5 pathogenic and benign variants
Q15583	1	5	6	genes with either less than 5 and or benign variants
Q15643	2	21	23	genes with either less than 5 and or benign variants
Q15649	1	0	1	genes with only pathogenic variants
Q15650	0	2	2	genes with only benign variants
Q15652	1	1	2	genes with either less than 5 and or benign variants
Q15672	3	1	4	genes with either less than 5 and or benign variants
Q15699	0	1	1	genes with only benign variants
Q15726	0	2	2	genes with only benign variants
Q15738	0	2	2	genes with only benign variants
Q15746	1	24	25	genes with either less than 5 and or benign variants
Q15751	1	9	10	genes with either less than 5 and or benign variants
Q15772	0	3	3	genes with only benign variants
Q15782	0	1	1	genes with only benign variants
Q15784	1	0	1	genes with only pathogenic variants
Q15796	1	0	1	genes with only pathogenic variants
Q15800	1	0	1	genes with only pathogenic variants
Q15811	1	0	1	genes with only pathogenic variants
Q15813	2	8	10	genes with either less than 5 and or benign variants
Q15822	0	9	9	genes with only benign variants
Q15831	18	2	20	genes with either less than 5 and or benign variants
Q15833	2	5	7	genes with either less than 5 and or benign variants
Q15835	0	2	2	genes with only benign variants
Q15842	0	3	3	genes with only benign variants
Q15858	9	15	24	genes with at least 5 pathogenic and benign variants
Q15878	11	3	14	genes with either less than 5 and or benign variants
Q15884	0	4	4	genes with only benign variants
Q15904	1	0	1	genes with only pathogenic variants
Q15907	1	0	1	genes with only pathogenic variants
Q15910	13	2	15	genes with either less than 5 and or benign variants
Q15911	0	1	1	genes with only benign variants
Q15915	2	2	4	genes with either less than 5 and or benign variants
Q15928	0	2	2	genes with only benign variants
Q16134	31	3	34	genes with either less than 5 and or benign variants
Q16281	43	3	46	genes with either less than 5 and or benign variants
Q16363	1	28	29	genes with either less than 5 and or benign variants
Q16394	8	6	14	genes with at least 5 pathogenic and benign variants
Q16518	35	3	38	genes with either less than 5 and or benign variants
Q16555	1	0	1	genes with only pathogenic variants
Q16572	2	0	2	genes with only pathogenic variants
Q16585	5	1	6	genes with either less than 5 and or benign variants
[truncated: 1,627 more rows]

## Sheet: Variant counts in the 257 genes
uniprot id	# pathogenic	# benign
O00459	7	8
O00469	5	6
O00754	10	10
O14773	23	9
O15118	58	9
O15360	27	24
O43186	11	5
O43379	5	14
O43511	69	11
O43525	14	15
O43526	134	17
O43933	7	5
O60260	9	7
O60313	24	6
O60315	5	57
O60500	20	9
O60741	8	6
O75027	5	11
O75197	18	5
O75593	7	5
O75648	10	12
O76024	25	32
O76039	47	20
O76082	38	5
O95140	52	5
O95255	47	16
O95259	9	5
O95342	20	8
O95427	7	6
O95528	5	10
O95817	5	10
O95831	9	9
P00450	5	7
P00740	49	8
P01009	8	32
P02452	101	12
P02458	89	9
P02462	41	19
P02730	13	7
P04049	41	11
P04156	9	6
P04264	8	7
P04629	9	9
P05106	28	7
P05107	5	6
P05129	9	5
P05155	14	7
P05997	6	20
P07196	10	6
P07202	5	5
P07333	10	28
P07477	10	5
P07911	16	10
P07954	57	5
P08123	111	11
P08514	34	9
P08559	32	5
P08572	5	33
P08581	5	9
P10253	100	10
P10636	9	13
P11166	49	6
P11182	6	5
P11217	22	6
P11362	19	7
P11498	6	8
P12109	31	22
P12110	29	29
P12755	8	9
P12830	13	46
P13647	32	16
P13942	6	15
P14136	26	9
P15056	65	13
P15848	46	5
P15884	17	12
P15918	32	7
P16278	41	7
P16871	6	6
P17405	38	8
P17813	20	10
P19438	16	5
P19971	12	7
P20807	47	6
P20823	30	13
P21549	33	6
P22304	32	11
P22557	10	10
P22607	21	17
P22681	11	12
P22735	39	7
P22888	5	5
P23378	31	8
P23415	13	7
P23760	13	5
P23786	12	5
P26358	6	18
P28329	6	10
P29033	56	8
P29400	138	17
P30518	13	15
P30531	31	5
P31040	12	6
P31327	10	7
P31513	5	9
P32004	14	6
P33897	68	12
P34059	43	6
P35475	31	6
P35523	45	11
P35609	6	6
P36021	10	5
P36507	12	13
P37287	9	5
P38935	16	16
P40238	11	6
P41180	52	9
P41229	8	7
P41250	10	8
P42704	5	17
P46019	8	12
P47870	14	7
P48029	8	10
P48165	8	8
P49419	23	6
P49711	7	5
P49747	23	5
P49748	40	5
P49917	7	6
P50416	9	6
P50570	22	8
P50747	7	11
P50993	28	6
P51531	36	17
P51532	23	5
P51608	53	59
P51649	6	8
P51659	9	9
P51688	29	8
P51690	7	6
P53420	36	14
P54098	77	15
P55017	46	8
P55316	39	20
P56696	8	6
P61764	41	8
P68871	46	19
P69905	23	23
P78504	11	13
P78562	60	6
P98174	6	6
Q01196	19	14
Q01955	43	17
Q01968	11	6
Q02318	11	5
Q02763	5	21
Q03468	6	18
Q03692	7	14
Q04446	10	8
Q04656	24	30
Q04671	13	8
Q05086	15	7
Q05193	22	10
Q06124	99	8
Q07889	40	27
Q08357	5	8
Q12768	7	5
Q12866	8	7
Q12879	38	30
Q13224	44	23
Q13461	7	7
Q13510	11	5
Q13563	9	5
Q13608	13	12
Q13627	12	16
Q13635	18	39
Q13642	5	5
Q13873	12	12
Q14721	27	23
Q15031	11	7
Q15049	8	5
Q15125	18	6
Q15147	6	15
Q15437	6	6
Q15582	6	5
Q16394	8	6
Q27J81	11	36
Q3T906	8	6
Q4G176	6	5
Q5JU85	9	16
Q5JUK3	33	28
Q5K651	6	8
Q5T160	12	9
Q5T481	11	16
Q75V66	13	7
Q7Z494	5	7
Q7Z6J9	5	14
Q7Z6L0	7	10
Q8IWY9	7	13
Q8IZF0	17	6
Q8N157	8	12
Q8N726	10	20
Q8N8W4	6	7
Q8NB90	7	6
Q8NEZ3	9	9
Q8NI60	13	7
Q8TAB3	40	20
Q8TCS8	7	5
Q8TD16	12	10
Q8TDN2	5	8
Q8TF17	8	8
Q92834	11	11
Q93099	17	5
Q969N2	5	5
Q96DP5	5	8
Q96MS0	16	16
Q96P20	28	5
Q96PV0	11	13
Q96QS3	11	10
Q96RP9	9	8
Q96RY7	10	19
Q99593	10	10
Q99758	6	8
Q99972	10	12
Q9BSI4	5	8
Q9BT22	9	5
Q9BYB0	10	9
Q9BYX4	9	5
Q9H334	12	8
Q9H845	12	9
Q9HBA0	23	23
Q9HC29	5	19
Q9NP59	9	6
Q9NPJ1	5	5
Q9NPP4	6	6
Q9NQ40	5	7
Q9NQW8	5	9
Q9NWW5	5	5
Q9NZC9	7	6
Q9NZV5	6	5
Q9P2K1	17	6
Q9P2R7	5	8
Q9UBF9	5	6
Q9UBP0	48	7
Q9UBY8	10	5
Q9UI33	6	10
Q9UKY4	6	5
Q9ULP9	16	5
Q9ULV1	7	5
Q9UQ90	14	8
Q9Y2Z2	6	6
Q9Y345	5	19
Q9Y3Q4	5	18
Q9Y484	9	7
Q9Y5X4	11	5
Q9Y653	8	7
Q9Y6A1	7	6
