# Supplementary material for: DeMAG predicts the effects of variants in clinically actionable genes by integrating structural and evolutionary epistatic features
Source: Nat Commun. 2023 Apr 19;14:2230. doi: 10.1038/s41467-023-37661-z (PMC10115847; doi:10.1038/s41467-023-37661-z)
Supplement: Supplementary file 5 — Supplementary Data 2 [file 41467_2023_37661_MOESM5_ESM.xlsx]

## Sheet: Disease prevalance
Disease name and MIM number	Gene via GTR	Gene	Prevalence of the disease	Prevalence of the disease (%, most conservative)	ICD-10	Inheritance	Link	Notes
Adenomatous polyposis coli (MIM 175100)	APC(MIM 611731)	APC	1-9 / 100 000	0.009	D12.6	AD	https://www.orpha.net/consor/cgi-bin/OC_Exp.php?lng=EN&Expert=733
Aortic aneurysm, familial thoracic 4 (MIM 132900)	MYH11(MIM 160745)	MYH11	< 1 / 1 000 000	0.0001	I71.2	AD	https://www.orpha.net/consor/cgi-bin/OC_Exp.php?lng=EN&Expert=91387
Aortic aneurysm, familial thoracic 6 (MIM 611788)	ACTA2(MIM 102620)	ACTA2	< 1 / 1 000 000	0.0001	I71.2	AD	https://www.orpha.net/consor/cgi-bin/OC_Exp.php?lng=EN&Expert=91387
Arrhythmogenic right ventricular cardiomyopathy, type 5 (MIM 604400)	TMEM43(MIM 612048)	TMEM43	ARVC occurs in an estimated 1 in 1,000 to 1 in 1,250 people.	0.1	I42.8	AD	https://www.orpha.net/consor/cgi-bin/OC_Exp.php?lng=EN&Expert=217656	Prevalence from: https://medlineplus.gov/genetics/condition/arrhythmogenic-right-ventricular-cardiomyopathy/
Arrhythmogenic right ventricular cardiomyopathy, type 8 (MIM 607450)	DSP(MIM 125647)	DSP	ARVC occurs in an estimated 1 in 1,000 to 1 in 1,250 people.	0.1	I42.8	AD	https://www.orpha.net/consor/cgi-bin/OC_Exp.php?lng=EN&Expert=217656	Prevalence from: https://medlineplus.gov/genetics/condition/arrhythmogenic-right-ventricular-cardiomyopathy/
Arrhythmogenic right ventricular cardiomyopathy, type 9 (MIM 609040)	PKP2(MIM 602861)	PKP2	ARVC occurs in an estimated 1 in 1,000 to 1 in 1,250 people.	0.1	I42.8	AD	https://www.orpha.net/consor/cgi-bin/OC_Exp.php?lng=EN&Expert=217656	Prevalence from: https://medlineplus.gov/genetics/condition/arrhythmogenic-right-ventricular-cardiomyopathy/
Arrhythmogenic right ventricular cardiomyopathy, type 10 (MIM 610193)	DSG2(MIM 125671)	DSG2	ARVC occurs in an estimated 1 in 1,000 to 1 in 1,250 people.	0.1	I42.8	AD	https://www.orpha.net/consor/cgi-bin/OC_Exp.php?lng=EN&Expert=217656	Prevalence from: https://medlineplus.gov/genetics/condition/arrhythmogenic-right-ventricular-cardiomyopathy/
Arrhythmogenic right ventricular cardiomyopathy, type 11 (MIM 610476)	DSC2(MIM 125645)	DSC2	ARVC occurs in an estimated 1 in 1,000 to 1 in 1,250 people.	0.1	I42.8	AD	https://www.orpha.net/consor/cgi-bin/OC_Exp.php?lng=EN&Expert=217656	Prevalence from: https://medlineplus.gov/genetics/condition/arrhythmogenic-right-ventricular-cardiomyopathy/
Breast-ovarian cancer, familial 1 (MIM 604370)	BRCA1(MIM 113705)	BRCA1	1-5 / 10 000	0.05	C50.0/C50.1/C50.2/C50.3/C50.4/C50.5/C50.6/C50.8/C56	AD	https://www.orpha.net/consor/cgi-bin/OC_Exp.php?lng=EN&Expert=145
Breast-ovarian cancer, familial 2 (MIM 612555)	BRCA2(MIM 600185)	BRCA2	1-5 / 10 000	0.05	C50.0/C50.1/C50.2/C50.3/C50.4/C50.5/C50.6/C50.8/C56	AD	https://www.orpha.net/consor/cgi-bin/OC_Exp.php?lng=EN&Expert=145
Brugada syndrome 1 (MIM 601144)	SCN5A(MIM 600163)	SCN5A	1/2000	0.05	I49.8	AD	https://www.orpha.net/consor/cgi-bin/Disease_Search.php?lng=EN&data_id=8022&Disease_Disease_Search_diseaseGroup=601144&Disease_Disease_Search_diseaseType=OMIM&Disease(s)/group%20of%20diseases=Brugada-syndrome&title=Brugada%20syndrome&search=Disease_Search_Simple	Worldwide prevalence (but in Asia 1/270)
Catecholaminergic polymorphic ventricular tachycardia (MIM 604772)	RYR2(MIM 180902)	RYR2	1 / 10 000	0.01	I47.2	AD	https://www.orpha.net/consor/cgi-bin/Disease_Search.php?lng=EN&data_id=3525&Disease_Disease_Search_diseaseGroup=604772&Disease_Disease_Search_diseaseType=OMIM&Disease(s)/group%20of%20diseases=Catecholaminergic-polymorphic-ventricular-tachycardia&title=Catecholaminergic%20polymorphic%20ventricular%20tachycardia&search=Disease_Search_Simple
Dilated cardiomyopathy 1A (MIM 115200)	LMNA(MIM 150330)	LMNA	1/2500	0.04	I42.0	AD	https://www.orpha.net/consor/cgi-bin/OC_Exp.php?lng=EN&Expert=154
Dilated cardiomyopathy 1A (MIM 115200)	MYBPC3(MIM 600958)	MYBPC3	1/2500	0.04	I42.0	AD	https://www.orpha.net/consor/cgi-bin/OC_Exp.php?lng=EN&Expert=154
Ehlers-Danlos syndrome, type 4 (MIM 130050)	COL3A1(MIM 120180)	COL3A1	1 /50000	0.002	Q79.6	AD	https://www.orpha.net/consor/cgi-bin/Disease_Search.php?lng=EN&data_id=4042&Disease_Disease_Search_diseaseGroup=130050&Disease_Disease_Search_diseaseType=OMIM&Disease(s)/group%20of%20diseases=Vascular-Ehlers-Danlos-syndrome&title=Vascular%20Ehlers-Danlos%20syndrome&search=Disease_Search_Simple
Fabry's disease (MIM 301500)	GLA(MIM 300644)	GLA	1/3000	0.0333333	E75.2	XL	https://www.orpha.net/consor/cgi-bin/OC_Exp.php?lng=EN&Expert=324
Familial hypercholesterolemia (MIM 143890)	APOB(MIM 107730)	APOB	1-9 / 1 000 000 - 1/200	0.5	E78.0	SD/AD	https://www.orpha.net/consor/cgi-bin/OC_Exp.php?lng=EN&Expert=391665	https://medlineplus.gov/genetics/condition/familial-hypercholesterolemia
	LDLR(MIM 606945)	LDLR	1-9 / 1 000 000 - 1/200	0.5	E78.0	SD/AD	https://www.orpha.net/consor/cgi-bin/OC_Exp.php?lng=EN&Expert=391665
Familial hypertrophic cardiomyopathy 1 (MIM 192600)	MYH7(MIM 160760)	MYH7	1 / 500	0.2	-	AD	https://ghr.nlm.nih.gov/condition/familial-hypertrophic-cardiomyopathy#statistics
Familial hypertrophic cardiomyopathy 3 (MIM 115196)	TPM1(MIM 191010)	TPM1	1 / 500	0.2	-	AD	https://ghr.nlm.nih.gov/condition/familial-hypertrophic-cardiomyopathy#statistics
Familial hypertrophic cardiomyopathy 4 (MIM 115197)	MYBPC3(MIM 600958)	MYBPC3	1 / 500	0.2	-	AD	https://ghr.nlm.nih.gov/condition/familial-hypertrophic-cardiomyopathy#statistics
Familial hypertrophic cardiomyopathy 6 (MIM 600858)	PRKAG2(MIM 602743)	PRKAG2	1 / 500	0.2	-	AD	https://ghr.nlm.nih.gov/condition/familial-hypertrophic-cardiomyopathy#statistics
Familial hypertrophic cardiomyopathy 7 (MIM 613690)	TNNI3(MIM 191044)	TNNI3	1 / 500	0.2	-	AD	https://ghr.nlm.nih.gov/condition/familial-hypertrophic-cardiomyopathy#statistics
Familial hypertrophic cardiomyopathy 8 (MIM 608751)	MYL3(MIM 160790)	MYL3	1 / 500	0.2	-	AD	https://ghr.nlm.nih.gov/condition/familial-hypertrophic-cardiomyopathy#statistics
Familial hypertrophic cardiomyopathy 10 (MIM 608758)	MYL2(MIM 160781)	MYL2	1 / 500	0.2	-	AD	https://ghr.nlm.nih.gov/condition/familial-hypertrophic-cardiomyopathy#statistics
Familial hypertrophic cardiomyopathy 11 (MIM 612098)	ACTC1(MIM 102540)	ACTC1	1 / 500	0.2	-	AD	https://ghr.nlm.nih.gov/condition/familial-hypertrophic-cardiomyopathy#statistics
Familial medullary thyroid carcinoma (MIM 155240)	RET(MIM 164761)	RET	1/35000	0.00285714	C73	AD	https://www.orpha.net/consor/cgi-bin/OC_Exp.php?lng=EN&Expert=99361
Hypercholesterolemia, autosomal dominant, 3 (MIM 603776)	PCSK9(MIM 607786)	PCSK9	1/200	0.5	-	AD	https://ghr.nlm.nih.gov/condition/familial-hypercholesterolemia#statistics
Juvenile polyposis syndrome, (MIM 174900)	BMPR1A(MIM 601299)	BMPR1A	Annual incidence is estimated at between 1/100,000 and 1/15,000	0.00666667	D12.6	AD	https://www.orpha.net/consor/cgi-bin/OC_Exp.php?lng=EN&Expert=2929
Juvenile polyposis syndrome, (MIM 174900)	SMAD4(MIM 600993)	SMAD4	Annual incidence is estimated at between 1/100,000 and 1/15,000	0.00666667	D12.6	AD	https://www.orpha.net/consor/cgi-bin/OC_Exp.php?lng=EN&Expert=2929
Left ventricular noncompaction 6 (MIM 601494)	TNNT2(MIM 191045)	TNNT2	8-12/1 000 000	0.0012	I42.8		https://www.orpha.net/consor/cgi-bin/OC_Exp.php?lng=EN&Expert=54260	Prevalence taken from here: https://medlineplus.gov/genetics/condition/left-ventricular-noncompaction/#frequency
Li-Fraumeni syndrome 1 (MIM 151623)	TP53(MIM 191170)	TP53	1/3555	0.0281294	D48.9	AD	https://www.orpha.net/consor/cgi-bin/Disease_Search.php?lng=EN&data_id=196&Disease_Disease_Search_diseaseGroup=151623&Disease_Disease_Search_diseaseType=OMIM&Disease(s)/group%20of%20diseases=Li-Fraumeni-syndrome&title=Li-Fraumeni%20syndrome&search=Disease_Search_Simple
Loeys-Dietz syndrome type 1A (MIM 609192)	TGFBR1(MIM 190181)	TGFBR1	unknown	0.5	Q87.4	AD	https://www.orpha.net/consor/cgi-bin/OC_Exp.php?lng=EN&Expert=60030
Loeys-Dietz syndrome type 1B (MIM 610168)	TGFBR2(MIM 190182)	TGFBR2	unknown	0.5	Q87.4	AD	https://www.orpha.net/consor/cgi-bin/OC_Exp.php?lng=EN&Expert=60030
Loeys-Dietz syndrome type 2A (MIM 608967)	TGFBR1(MIM 190181)	TGFBR1	unknown	0.5	Q87.4	AD	https://www.orpha.net/consor/cgi-bin/OC_Exp.php?lng=EN&Expert=60030
Loeys-Dietz syndrome type 2B (MIM 610380)	TGFBR2(MIM 190182)	TGFBR2	unknown	0.5	Q87.4	AD	https://www.orpha.net/consor/cgi-bin/OC_Exp.php?lng=EN&Expert=60030
Loeys-Dietz syndrome type 3 (MIM 613795)	SMAD3(MIM 603109)	SMAD3	unknown	0.5	Q87.4	AD	https://www.orpha.net/consor/cgi-bin/OC_Exp.php?lng=EN&Expert=60030
Long QT syndrome 1 (MIM 0)	KCNQ1(MIM 607542)	KCNQ1	Disease prevalence is estimated at close to 1 in 2,500 live births.	0.04	I45.8	AD	https://www.orpha.net/consor/cgi-bin/Disease_Search.php?lng=EN&data_id=658&Disease_Disease_Search_diseaseGroup=192500&Disease_Disease_Search_diseaseType=OMIM&Disease(s)/group%20of%20diseases=Familial-long-QT-syndrome&title=Familial%20long%20QT%20syndrome&search=Disease_Search_Simple
Long QT syndrome 2 (MIM 613688)	KCNH2(MIM 152427)	KCNH2	Disease prevalence is estimated at close to 1 in 2,500 live births.	0.04	I45.8	AD	https://www.orpha.net/consor/cgi-bin/Disease_Search.php?lng=EN&data_id=658&Disease_Disease_Search_diseaseGroup=192500&Disease_Disease_Search_diseaseType=OMIM&Disease(s)/group%20of%20diseases=Familial-long-QT-syndrome&title=Familial%20long%20QT%20syndrome&search=Disease_Search_Simple
Long QT syndrome 3 (MIM 603830)	SCN5A(MIM 600163)	SCN5A	Disease prevalence is estimated at close to 1 in 2,500 live births.	0.04	I45.8	AD	https://www.orpha.net/consor/cgi-bin/Disease_Search.php?lng=EN&data_id=658&Disease_Disease_Search_diseaseGroup=192500&Disease_Disease_Search_diseaseType=OMIM&Disease(s)/group%20of%20diseases=Familial-long-QT-syndrome&title=Familial%20long%20QT%20syndrome&search=Disease_Search_Simple
Lynch syndrome (MIM 120435)	MLH1(MIM 120436)	MLH1	1 /279 (US population)	0.358423	D48.9	AD	https://www.nature.com/articles/ncomms14755	Most conservative prevalence here: https://medlineplus.gov/genetics/condition/lynch-syndrome/#frequency
	MSH2(MIM 609309)	MSH2	1 /279 (US population)	0.358423	D48.9	AD	https://www.nature.com/articles/ncomms14755	Most conservative prevalence here: https://medlineplus.gov/genetics/condition/lynch-syndrome/#frequency
	MSH6(MIM 600678)	MSH6	1 /279 (US population)	0.358423	D48.9	AD	https://www.nature.com/articles/ncomms14755	Most conservative prevalence here: https://medlineplus.gov/genetics/condition/lynch-syndrome/#frequency
	PMS2(MIM 600259)	PMS2	1 /279 (US population)	0.358423	D48.9	AD	https://www.nature.com/articles/ncomms14755	Most conservative prevalence here: https://medlineplus.gov/genetics/condition/lynch-syndrome/#frequency
Malignant hyperthermia (MIM 145600)	RYR1(MIM 180901)	RYR1	The incidence of MH reactions ranges from 1/5000 to 1/50,000-100,000 anesthesias. However, the genetic prevalence of the genetic abnormalities may be as great as 1/400 individuals.	0.25	T88.3	AD	https://www.orpha.net/consor/cgi-bin/Disease_Search.php?lng=EN&data_id=649&Disease_Disease_Search_diseaseGroup=145600&Disease_Disease_Search_diseaseType=OMIM&Disease(s)/group%20of%20diseases=Malignant-hyperthermia-of-anesthesia&title=Malignant%20hyperthermia%20of%20anesthesia&search=Disease_Search_Simple
	CACNA1S(MIM 114208)	CACNA1S	The incidence of MH reactions ranges from 1/5000 to 1/50,000-100,000 anesthesias. However, the genetic prevalence of the genetic abnormalities may be as great as 1/400 individuals.	0.25	T88.3	AD	https://www.orpha.net/consor/cgi-bin/Disease_Search.php?lng=EN&data_id=649&Disease_Disease_Search_diseaseGroup=145600&Disease_Disease_Search_diseaseType=OMIM&Disease(s)/group%20of%20diseases=Malignant-hyperthermia-of-anesthesia&title=Malignant%20hyperthermia%20of%20anesthesia&search=Disease_Search_Simple
Marfan's syndrome (MIM 154700)	FBN1(MIM 134797)	FBN1	1 / 5 000	0.02	Q87.4	AD	https://www.orpha.net/consor/cgi-bin/OC_Exp.php?lng=EN&Expert=558
Marfan's syndrome (MIM 154700)	TGFBR1(MIM 190181)	TGFBR1	1 / 5 000	0.02	Q87.4	AD	https://www.orpha.net/consor/cgi-bin/OC_Exp.php?lng=EN&Expert=652
Multiple endocrine neoplasia, type 1 (MIM 131100)	MEN1(MIM 613733)	MEN1	1 / 10 000	0.01	D44.8	AD	https://www.orpha.net/consor/cgi-bin/OC_Exp.php?lng=EN&Expert=652
Multiple endocrine neoplasia, type 2a (MIM 171400)	RET(MIM 164761)	RET	1 / 10 000	0.01	D44.8	AD	https://www.orpha.net/consor/cgi-bin/OC_Exp.php?lng=EN&Expert=652
Multiple endocrine neoplasia, type 2b (MIM 162300)	RET(MIM 164761)	RET	1 / 10 000	0.01	D44.8	AD	https://www.orpha.net/consor/cgi-bin/OC_Exp.php?lng=EN&Expert=652
MYH-associated polyposis (MIM 608456)	MUTYH(MIM 604933)	MUTYH	The reported incidence of familial adenomatous polyposis varies from 1 in 7,000 to 1 in 22,000 individuals.	0.0142857	D12.6	AR	https://www.orpha.net/consor/cgi-bin/OC_Exp.php?lng=EN&Expert=247798
Neurofibromatosis, type 2 (MIM 101000)	NF2(MIM 607379)	NF2	1/60000	0.00166667	Q85.0	AD	https://www.orpha.net/consor/cgi-bin/Disease_Search.php?lng=EN&data_id=183&Disease_Disease_Search_diseaseGroup=101000&Disease_Disease_Search_diseaseType=OMIM&Disease(s)/group%20of%20diseases=Neurofibromatosis-type-2&title=Neurofibromatosis%20type%202&search=Disease_Search_Simple
Ornithine carbamoyltransferase deficiency (MIM 311250)	OTC(MIM 300461)	OTC	Worldwide prevalence estimates range between 1/56,500 to 1/113,000 live births.	0.00176991	E72.4	XL	https://www.orpha.net/consor/cgi-bin/Disease_Search.php?lng=EN&data_id=168&Disease_Disease_Search_diseaseGroup=311250&Disease_Disease_Search_diseaseType=OMIM&Disease(s)/group%20of%20diseases=Ornithine-transcarbamylase-deficiency&title=Ornithine%20transcarbamylase%20deficiency&search=Disease_Search_Simple
Paragangliomas 1 (MIM 168000)	SDHD(MIM 602690)	SDHD	1-9 / 1 000 000	0.0009	C74.1/C75.5/D35.0/D35.6	AD	https://www.orpha.net/consor/cgi-bin/OC_Exp.php?lng=EN&Expert=29072	Confirmed prevalence also here:https://medlineplus.gov/genetics/condition/hereditary-paraganglioma-pheochromocytoma/
Paragangliomas 2 (MIM 601650)	SDHAF2(MIM 613019)	SDHAF2	1-9 / 1 000 000	0.0009	C74.1/C75.5/D35.0/D35.6	AD	https://www.orpha.net/consor/cgi-bin/OC_Exp.php?lng=EN&Expert=29072	Confirmed prevalence also here:https://medlineplus.gov/genetics/condition/hereditary-paraganglioma-pheochromocytoma/
Paragangliomas 3 (MIM 605373)	SDHC(MIM 602413)	SDHC	1-9 / 1 000 000	0.0009	C74.1/C75.5/D35.0/D35.6	AD	https://www.orpha.net/consor/cgi-bin/OC_Exp.php?lng=EN&Expert=29072	Confirmed prevalence also here:https://medlineplus.gov/genetics/condition/hereditary-paraganglioma-pheochromocytoma/
Paragangliomas 4 (MIM 115310)	SDHB(MIM 185470)	SDHB	1-9 / 1 000 000	0.0009	C74.1/C75.5/D35.0/D35.6	AD	https://www.orpha.net/consor/cgi-bin/OC_Exp.php?lng=EN&Expert=29072	Confirmed prevalence also here:https://medlineplus.gov/genetics/condition/hereditary-paraganglioma-pheochromocytoma/
Peutz-Jeghers syndrome (MIM 175200)	STK11(MIM 602216)	STK11	Peutz-Jeghers syndrome (PJS) prevalence estimates range from 1/25,000 to 1/300,000 births.	0.004	Q85.8	AD	https://www.orpha.net/consor/cgi-bin/OC_Exp.php?lng=EN&Expert=2869
Pilomatrixoma (MIM 132600)	MUTYH(MIM 604933)	MUTYH	unknown	0.5	D23.3/D23.4/D23.6		https://www.orpha.net/consor/cgi-bin/OC_Exp.php?lng=EN&Expert=91414
PTEN hamartoma tumor syndrome (MIM 153480)	PTEN(MIM 601728)	PTEN	Cowden syndrome (CS) CS has been described in many ancestral groups. The prevalence is unknown but is estimated at 1/200,000.	0.0005	Q87.8/Q85.8/Q04.8/Q87.3	AD	https://www.omim.org/entry/158350#OrphanetFold	Prevalence taken from: https://www.orpha.net/consor/cgi-bin/OC_Exp.php?lng=EN&Expert=201
Retinoblastoma (MIM 180200)	RB1(MIM 614041)	RB1	Retinoblastoma is diagnosed in 250 to 350 children per year in the United States/ Retonoblastoma (RB) has an incidence of approximately 1/15-20,000 in Europe.	0.4	C69.2	AD	https://medlineplus.gov/genetics/condition/retinoblastoma/#inheritance	ICD-10 code from orphanet: https://www.orpha.net/consor/cgi-bin/OC_Exp.php?lng=EN&Expert=790
Tuberous sclerosis 1 (MIM 191100)	TSC1(MIM 605284)	TSC1	The prevalence is estimated to be 1/25,000-1/11,300 in Europe/Tuberous sclerosis complex affects about 1 in 6,000 people.	0.00884956	Q85.1	AD	https://www.orpha.net/consor/cgi-bin/OC_Exp.php?lng=EN&Expert=805	The most conservative prevalence is here: https://medlineplus.gov/genetics/condition/tuberous-sclerosis-complex/#inheritance
Tuberous sclerosis 2 (MIM 613254)	TSC2(MIM 191092)	TSC2	The prevalence is estimated to be 1/25,000-1/11,300 in Europe.	0.00884956	Q85.1	AD	https://www.orpha.net/consor/cgi-bin/OC_Exp.php?lng=EN&Expert=805	The most conservative prevalence is here: https://medlineplus.gov/genetics/condition/tuberous-sclerosis-complex/#inheritance
Von Hippel-Lindau syndrome (MIM 193300)	VHL(MIM 608537)	VHL	Prevalence is estimated at 1/53,000 and annual birth incidence at 1/36,000.	0.00277778	Q85.8	AD	https://www.orpha.net/consor/cgi-bin/OC_Exp.php?lng=EN&Expert=892
Wilms' tumor (MIM 194070)	WT1(MIM 607102)	WT1	The annual incidence is estimated at about 1/10,000 births and it affects boys as well as girls.	0.01	C64	AD	https://www.orpha.net/consor/cgi-bin/OC_Exp.php?lng=EN&Expert=654
Wilson disease (MIM 277900)	ATP7B(MIM 606882)	ATP7B	38.7/1000000	0.0038	E83.0	AR	https://www.orpha.net/consor/cgi-bin/OC_Exp.php?lng=EN&Expert=905	Prevalence here: https://www.nature.com/articles/s41598-020-70976-1
